# Supplementary material for: Mechanism of the Photochemical Isomerization and Oxidation of 2-Butenedial: A Theoretical Study
Source: MDPI journal article supplement (doi:10.3390/molecules28134994), 2023-06-26
Supplement: s1 [file s1]

# Mechanism of the photochemical isomerization and oxidation of 2-butenedial: A Theoretical Study

Andrea Maranzana and Glauco Tonachini

**Supplementary Materials**

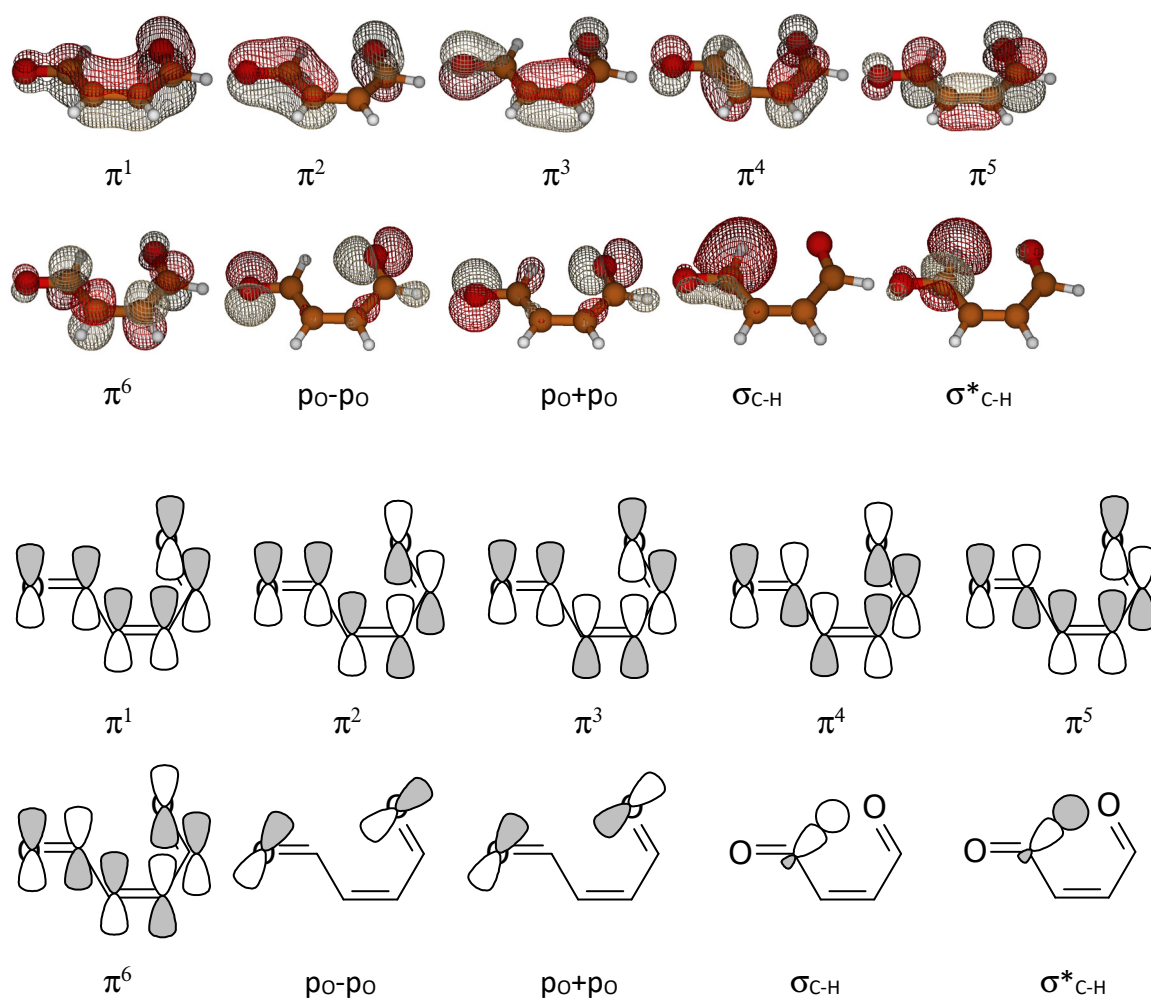

**Figure S1.** Active orbitals

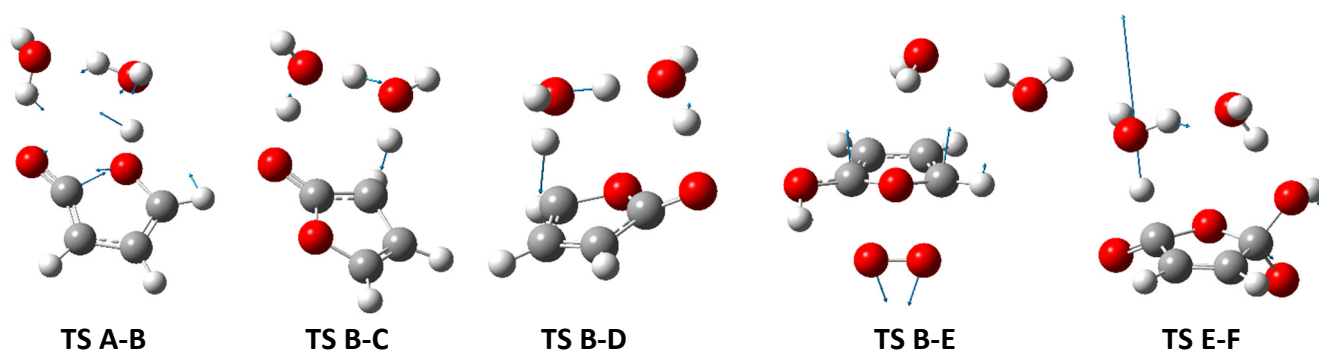

**Figure S2.** Displacement vectors for the transition structures.

## Formation of furanones

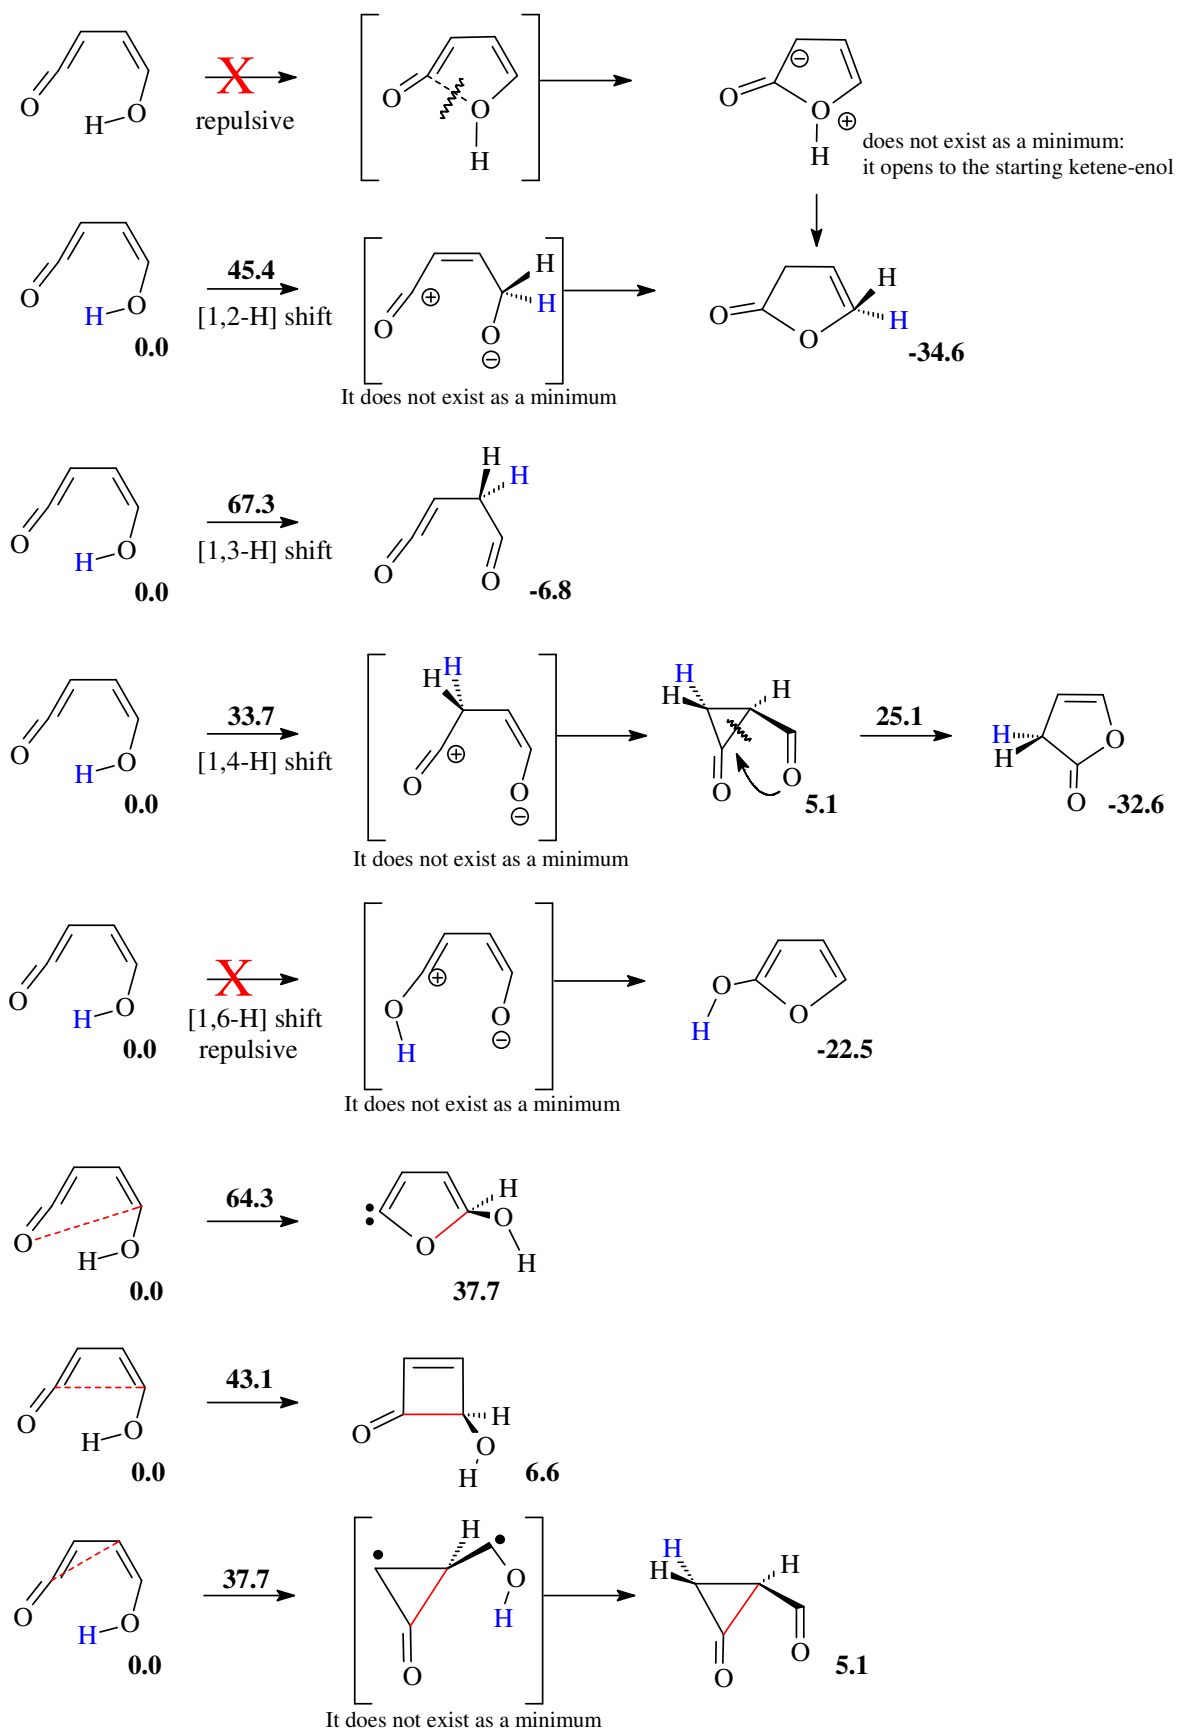

**Scheme S1.** Attempts to form furanones from ketene-enol, in the ground state. M06-2X/6-31G(d) potential energies in kcal mol<sup>-1</sup>.

**Possible formation of maleic anhydride if the hydroxyl radical had a major role and NOx concentration were substantial.**

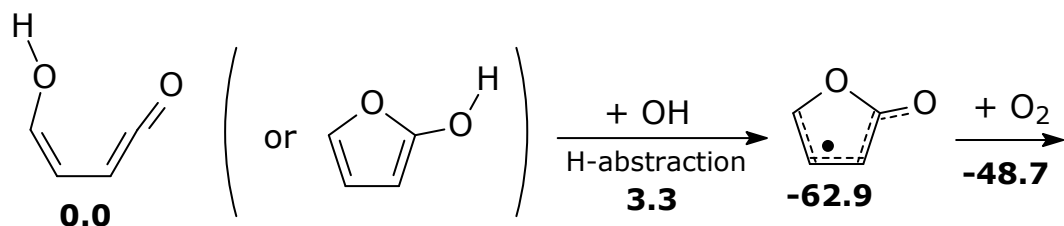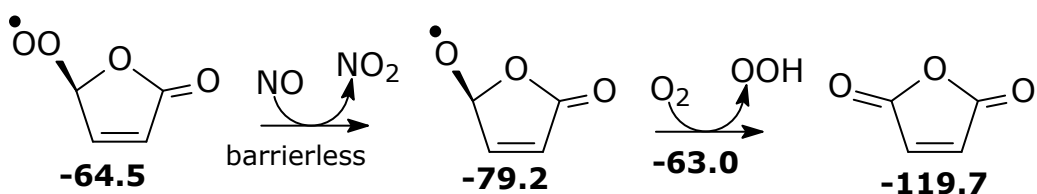

**Scheme S2.** Formation of maleic anhydride from ketene-enol **A** (or 2-furanol **B**), initiated by OH.  $\Delta G(298K)$  M06-2X/cc-pVTZ in kcal mol<sup>-1</sup>.

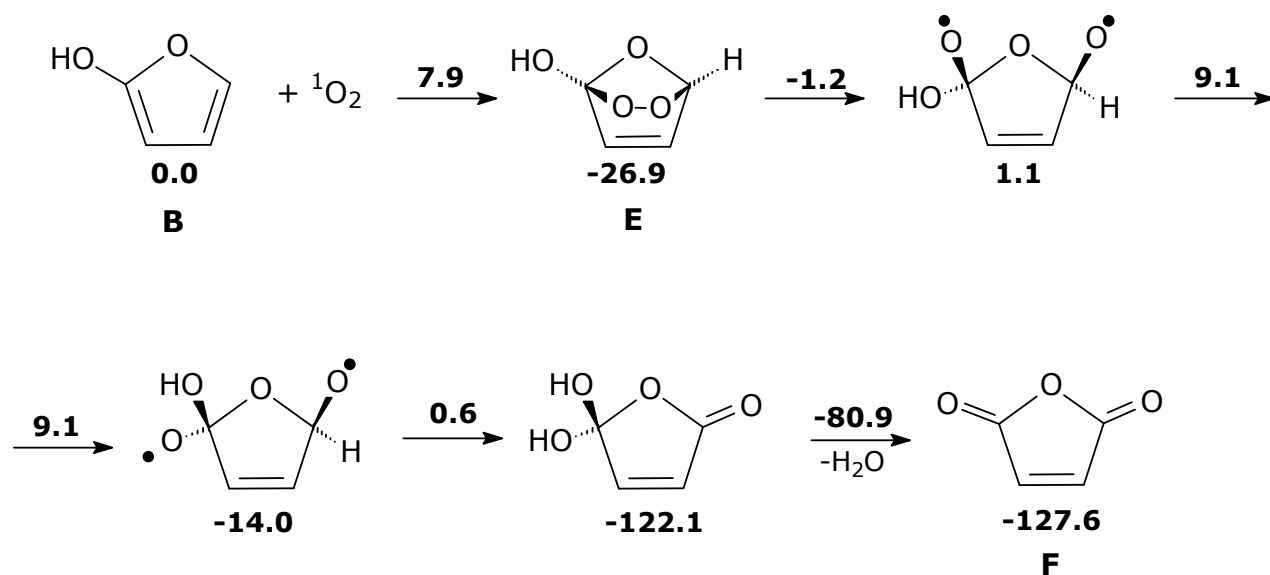

**Scheme S3.** Formation of maleic anhydride from ketene-enol in the gas phase, initiated by  $^1\text{O}_2$ , without intervention of water molecules.  $\Delta G(298\text{K})$  M06-2X/cc-pVTZ in kcal mol $^{-1}$ .

## Cartesian coordinates and energies

### Formation of furanones without water molecules:

#### A

| Atom | X         | Y         | Z (Angstrom) |
|------|-----------|-----------|--------------|
| 8    | 2.142733  | -0.668503 | -0.000002    |
| 8    | -0.939391 | -1.272032 | -0.000003    |
| 6    | 1.331917  | 0.152744  | 0.000000     |
| 6    | 0.479153  | 1.159488  | 0.000004     |
| 6    | -0.973665 | 1.052283  | -0.000002    |
| 6    | -1.637058 | -0.097448 | -0.000001    |
| 1    | -1.534099 | -2.023099 | 0.000033     |
| 1    | -1.535363 | 1.972664  | -0.000008    |
| 1    | -2.716220 | -0.156261 | -0.000006    |
| 1    | 0.956866  | 2.128581  | 0.000012     |

Energy -305.216208 (Hartree)

Frequencies (cm-1):

|         |         |         |         |         |         |         |         |
|---------|---------|---------|---------|---------|---------|---------|---------|
| 103.18  | 150.41  | 212.77  | 269.22  | 479.16  | 536.65  | 591.82  | 618.85  |
| 741.80  | 828.88  | 921.98  | 949.66  | 1084.24 | 1150.33 | 1226.15 | 1284.52 |
| 1413.37 | 1461.13 | 1764.24 | 2238.80 | 3220.36 | 3224.50 | 3257.09 | 3926.22 |

#### TS A-B

| Atom | X         | Y         | Z (Angstrom) |
|------|-----------|-----------|--------------|
| 8    | -1.967494 | 0.023086  | -0.097644    |
| 8    | -0.123675 | -0.984478 | 0.136748     |
| 6    | -0.757545 | 0.321361  | 0.077214     |
| 6    | 0.247301  | 1.235290  | 0.059178     |
| 6    | 1.485765  | 0.499095  | -0.050225    |
| 6    | 1.264654  | -0.824738 | -0.073283    |
| 1    | -1.167272 | -1.223046 | -0.223980    |
| 1    | 0.120117  | 2.299514  | 0.009894     |
| 1    | 2.467468  | 0.939140  | -0.114171    |
| 1    | 1.867994  | -1.710525 | -0.061880    |

Energy -305.141098 (Hartree)

Frequencies (cm-1):

|          |         |         |         |         |         |         |         |
|----------|---------|---------|---------|---------|---------|---------|---------|
| 1648.25i | 220.91  | 527.04  | 573.94  | 616.21  | 655.67  | 730.44  | 742.25  |
| 780.17   | 860.54  | 918.27  | 953.99  | 1015.84 | 1058.28 | 1129.86 | 1184.92 |
| 1302.96  | 1370.13 | 1609.78 | 1800.55 | 2256.02 | 3267.03 | 3315.78 | 3338.36 |

#### B

| Atom | X         | Y         | Z (Angstrom) |
|------|-----------|-----------|--------------|
| 8    | -2.002732 | 0.089243  | 0.000031     |
| 8    | -0.021374 | -1.045085 | 0.000004     |
| 6    | -0.664845 | 0.134841  | -0.000015    |
| 6    | 0.194892  | 1.176821  | -0.000007    |
| 6    | 1.500686  | 0.576194  | 0.000008     |
| 6    | 1.321220  | -0.758144 | 0.000003     |
| 1    | -2.281408 | -0.832205 | -0.000160    |
| 1    | -0.065590 | 2.218658  | -0.000043    |
| 1    | 2.447546  | 1.087248  | 0.000003     |
| 1    | 1.980587  | -1.605239 | -0.000014    |

Energy -305.243573 (Hartree)

Frequencies (cm-1):

|         |         |         |         |         |         |         |         |
|---------|---------|---------|---------|---------|---------|---------|---------|
| 173.63  | 299.20  | 430.87  | 620.57  | 680.39  | 697.39  | 739.22  | 796.20  |
| 896.17  | 901.56  | 988.66  | 1024.38 | 1106.17 | 1174.19 | 1200.81 | 1281.89 |
| 1327.94 | 1475.05 | 1600.03 | 1715.78 | 3282.28 | 3308.04 | 3318.61 | 3873.39 |

#### TS B-C

| Atom | X        | Y         | Z (Angstrom) |
|------|----------|-----------|--------------|
| 8    | 1.564690 | 0.169298  | 0.535997     |
| 8    | 0.215042 | -0.985112 | -0.642180    |
| 6    | 0.709233 | 0.259902  | -0.393812    |

|   |           |           |           |
|---|-----------|-----------|-----------|
| 6 | -0.370324 | 1.205803  | -0.336800 |
| 6 | -1.334302 | 0.418541  | 0.225032  |
| 6 | -0.818697 | -0.919208 | 0.322607  |
| 1 | 0.606022  | -0.485422 | 1.193709  |
| 1 | -1.433901 | -1.804649 | 0.397152  |
| 1 | -2.254153 | 0.750566  | 0.679872  |
| 1 | -0.271295 | 2.275778  | -0.323435 |

Energy -305.084168 (Hartree)

Frequencies (cm-1):

|          |         |         |         |         |         |         |         |
|----------|---------|---------|---------|---------|---------|---------|---------|
| 1862.31i | 365.84  | 459.10  | 608.46  | 650.39  | 692.14  | 761.73  | 825.63  |
| 923.22   | 941.87  | 992.17  | 1026.77 | 1085.41 | 1131.52 | 1144.17 | 1191.43 |
| 1328.70  | 1385.65 | 1497.04 | 1525.64 | 1721.19 | 3227.93 | 3258.11 | 3300.20 |

## C

| Atom | X         | Y         | Z (Angstrom) |
|------|-----------|-----------|--------------|
| 8    | 2.005502  | -0.029346 | 0.000031     |
| 8    | 0.049450  | -1.131093 | -0.000032    |
| 6    | 0.819609  | 0.009309  | -0.000001    |
| 6    | -0.115136 | 1.207330  | -0.000025    |
| 6    | -1.464188 | 0.558967  | 0.000024     |
| 6    | -1.277499 | -0.750623 | 0.000010     |
| 1    | 0.088972  | 1.820534  | 0.878483     |
| 1    | -2.415812 | 1.060710  | 0.000072     |
| 1    | -1.978416 | -1.568045 | 0.000034     |
| 1    | 0.088926  | 1.820413  | -0.878632    |

Energy -305.256241 (Hartree)

Frequencies (cm-1):

|         |         |         |         |         |         |         |         |
|---------|---------|---------|---------|---------|---------|---------|---------|
| 172.08  | 444.62  | 501.52  | 577.39  | 684.09  | 740.01  | 832.18  | 867.06  |
| 950.87  | 973.60  | 993.44  | 1094.34 | 1138.74 | 1169.44 | 1190.48 | 1290.93 |
| 1385.70 | 1443.96 | 1710.44 | 1938.03 | 3088.16 | 3124.45 | 3272.69 | 3295.97 |

## TS B-D

| Atom | X         | Y         | Z (Angstrom) |
|------|-----------|-----------|--------------|
| 8    | -2.044741 | -0.046791 | 0.020288     |
| 8    | -0.006691 | -1.112834 | -0.084435    |
| 6    | -0.869454 | 0.111612  | -0.036381    |
| 6    | 0.056643  | 1.188906  | -0.019665    |
| 6    | 1.348311  | 0.735562  | 0.024613     |
| 6    | 1.434794  | -0.653369 | 0.052393     |
| 1    | 0.530883  | -1.310666 | 0.871933     |
| 1    | 2.226373  | 1.364040  | 0.040462     |
| 1    | -0.274591 | 2.211824  | -0.019849    |
| 1    | 2.107026  | -1.284458 | -0.505138    |

Energy -305.139832 (Hartree)

Frequencies (cm-1):

|          |         |         |         |         |         |         |         |
|----------|---------|---------|---------|---------|---------|---------|---------|
| 1687.54i | 220.73  | 473.11  | 527.84  | 553.23  | 632.64  | 677.43  | 735.19  |
| 792.72   | 819.05  | 858.12  | 974.73  | 1085.78 | 1097.67 | 1118.03 | 1136.87 |
| 1278.43  | 1450.50 | 1566.01 | 1921.74 | 2458.25 | 3240.78 | 3263.12 | 3294.87 |

## D

| Atom | X         | Y         | Z (Angstrom) |
|------|-----------|-----------|--------------|
| 8    | -2.028810 | -0.037266 | 0.000000     |
| 8    | -0.045353 | -1.092452 | 0.000005     |
| 6    | -0.838676 | 0.019065  | 0.000000     |
| 6    | 0.055988  | 1.202992  | -0.000003    |
| 6    | 1.310566  | 0.779790  | 0.000005     |
| 6    | 1.320848  | -0.716902 | -0.000004    |
| 1    | 1.807930  | -1.129003 | 0.886016     |
| 1    | -0.325354 | 2.210048  | 0.000001     |
| 1    | 2.210465  | 1.376011  | 0.000006     |
| 1    | 1.807913  | -1.128982 | -0.886043    |

Energy -305.259922 (Hartree)

Frequencies (cm-1):

|         |         |         |         |         |         |         |         |
|---------|---------|---------|---------|---------|---------|---------|---------|
| 206.80  | 359.82  | 504.66  | 683.88  | 707.87  | 801.93  | 840.24  | 900.98  |
| 962.48  | 988.54  | 1046.28 | 1079.84 | 1152.82 | 1179.89 | 1225.46 | 1362.68 |
| 1388.26 | 1503.74 | 1693.75 | 1909.12 | 3068.66 | 3105.64 | 3245.65 | 3282.68 |

# Formation of furanones with 1 water molecule:

## A

| Atom | X         | Y         | Z (Angstrom) |
|------|-----------|-----------|--------------|
| 6    | -1.446569 | 0.775397  | 0.488447     |
| 6    | -0.112953 | 1.375604  | 0.541915     |
| 6    | 0.921176  | 1.031405  | -0.195433    |
| 8    | 1.878749  | 0.743263  | -0.779975    |
| 6    | -1.776661 | -0.309204 | -0.209750    |
| 8    | -0.904326 | -1.031969 | -0.960123    |
| 1    | 0.073104  | 2.236807  | 1.168827     |
| 1    | -2.218076 | 1.279624  | 1.050029     |
| 1    | -2.802311 | -0.653869 | -0.253771    |
| 1    | -0.159191 | -1.334336 | -0.406940    |
| 8    | 1.116087  | -1.736053 | 0.823582     |
| 1    | 1.957256  | -1.429334 | 0.470882     |
| 1    | 0.915173  | -1.140033 | 1.552023     |

Energy -381.654788 (Hartree)

Frequencies (cm-1):

|         |         |         |         |         |         |         |         |
|---------|---------|---------|---------|---------|---------|---------|---------|
| 30.56   | 86.42   | 113.07  | 142.94  | 189.42  | 210.94  | 270.57  | 339.45  |
| 364.68  | 471.29  | 525.70  | 590.53  | 625.62  | 669.57  | 774.77  | 850.00  |
| 941.78  | 957.50  | 1091.55 | 1149.83 | 1262.85 | 1396.26 | 1413.55 | 1450.86 |
| 1625.38 | 1729.04 | 2222.63 | 3196.50 | 3214.19 | 3240.63 | 3561.71 | 3838.03 |
| 3930.76 |         |         |         |         |         |         |         |

## TS A-B

| Atom | X         | Y         | Z (Angstrom) |
|------|-----------|-----------|--------------|
| 6    | -1.177230 | -1.254028 | -0.077439    |
| 8    | 0.070375  | -0.672013 | -0.324586    |
| 6    | -0.038595 | 0.818437  | -0.096580    |
| 6    | -1.363737 | 1.002783  | 0.167948     |
| 6    | -2.040191 | -0.263599 | 0.178640     |
| 8    | 1.041426  | 1.413861  | -0.169168    |
| 8    | 2.376535  | -0.688558 | 0.165301     |
| 1    | 1.101711  | -0.971076 | -0.033770    |
| 1    | 2.143363  | 0.299707  | 0.052672     |
| 1    | 2.704521  | -0.817462 | 1.059665     |
| 1    | -1.251985 | -2.315929 | -0.210524    |
| 1    | -1.793799 | 1.966530  | 0.365876     |
| 1    | -3.091982 | -0.409641 | 0.358281     |

Energy -381.634683 (Hartree)

Frequencies (cm-1):

|         |         |         |         |         |         |         |         |
|---------|---------|---------|---------|---------|---------|---------|---------|
| 461.39i | 78.12   | 266.53  | 342.37  | 439.40  | 469.44  | 539.59  | 568.84  |
| 597.71  | 621.62  | 702.22  | 709.99  | 746.27  | 828.93  | 914.02  | 995.86  |
| 1021.58 | 1048.31 | 1124.85 | 1178.29 | 1202.54 | 1254.66 | 1353.13 | 1403.32 |
| 1592.28 | 1633.83 | 1836.30 | 1945.19 | 2854.36 | 3271.92 | 3304.27 | 3325.37 |
| 3903.18 |         |         |         |         |         |         |         |

## B

| Atom | X         | Y         | Z (Angstrom) |
|------|-----------|-----------|--------------|
| 6    | -1.497982 | 0.958164  | 0.046766     |
| 6    | -0.182224 | 0.648956  | -0.014249    |
| 8    | -0.000383 | -0.694079 | -0.055264    |
| 6    | -1.251746 | -1.265664 | -0.020108    |
| 6    | -2.187407 | -0.301618 | 0.041604     |
| 8    | 0.901991  | 1.411747  | -0.043730    |
| 8    | 2.844270  | -0.516415 | -0.038342    |

|   |           |           |           |
|---|-----------|-----------|-----------|
| 1 | -1.911936 | 1.948163  | 0.087073  |
| 1 | -3.251448 | -0.456962 | 0.079194  |
| 1 | -1.278791 | -2.338400 | -0.047811 |
| 1 | 3.346897  | -0.677492 | 0.763325  |
| 1 | 1.704023  | 0.850445  | -0.057358 |
| 1 | 2.140387  | -1.174811 | -0.049810 |

Energy -381.685522 (Hartree)

Frequencies (cm-1):

|         |         |         |         |         |         |         |         |
|---------|---------|---------|---------|---------|---------|---------|---------|
| 28.87   | 118.07  | 154.79  | 198.36  | 239.43  | 296.03  | 434.40  | 507.29  |
| 613.64  | 672.98  | 701.77  | 704.30  | 728.62  | 793.59  | 896.20  | 900.63  |
| 979.37  | 1024.99 | 1113.01 | 1185.97 | 1229.54 | 1300.30 | 1372.14 | 1487.30 |
| 1606.33 | 1620.39 | 1724.01 | 3281.42 | 3307.85 | 3320.87 | 3516.57 | 3834.77 |
| 3947.64 |         |         |         |         |         |         |         |

# **TS B-C**

| Atom | X         | Y         | Z (Angstrom) |
|------|-----------|-----------|--------------|
| 6    | -1.606534 | -0.099648 | -0.522374    |
| 6    | -0.668250 | -1.097337 | -0.687599    |
| 6    | 0.354172  | -0.820549 | 0.253657     |
| 8    | -0.116454 | 0.094473  | 1.146375     |
| 6    | -1.196279 | 0.737604  | 0.526952     |
| 8    | 1.594702  | -0.957019 | 0.191237     |
| 8    | 1.118941  | 1.436153  | -0.576019    |
| 1    | -0.575006 | -1.808425 | -1.488350    |
| 1    | -2.473373 | 0.083186  | -1.138588    |
| 1    | -1.825385 | 1.315566  | 1.184288     |
| 1    | 1.195184  | 1.520738  | -1.533726    |
| 1    | 1.574636  | 0.526209  | -0.275721    |
| 1    | 0.027776  | 1.453461  | -0.264464    |

Energy -381.613341 (Hartree)

Frequencies (cm-1):

|          |         |         |         |         |         |         |         |
|----------|---------|---------|---------|---------|---------|---------|---------|
| 1074.07i | 163.68  | 315.02  | 374.42  | 419.35  | 464.90  | 512.64  | 650.26  |
| 690.79   | 709.74  | 783.27  | 820.72  | 847.74  | 919.24  | 944.98  | 992.90  |
| 1050.16  | 1104.52 | 1152.08 | 1194.13 | 1253.36 | 1267.63 | 1347.33 | 1451.09 |
| 1536.03  | 1616.29 | 1688.37 | 1702.84 | 2231.10 | 3244.00 | 3259.60 | 3294.13 |
| 3864.29  |         |         |         |         |         |         |         |

# **C**

| Atom | X         | Y         | Z (Angstrom) |
|------|-----------|-----------|--------------|
| 6    | 2.140802  | 0.120630  | 0.000109     |
| 6    | 1.458188  | 1.252651  | -0.000014    |
| 6    | 0.002968  | 0.907234  | -0.000137    |
| 6    | 0.038011  | -0.606964 | -0.000062    |
| 8    | 1.341048  | -1.011580 | 0.000085     |
| 8    | -0.861078 | -1.394200 | -0.000114    |
| 8    | -2.914813 | 0.558545  | 0.000053     |
| 1    | -0.556738 | 1.253702  | 0.869627     |
| 1    | 1.879045  | 2.242739  | -0.000018    |
| 1    | 3.198162  | -0.080550 | 0.000226     |
| 1    | -3.853801 | 0.368158  | 0.000649     |
| 1    | -2.471170 | -0.301098 | -0.000003    |
| 1    | -0.556570 | 1.253625  | -0.870040    |

Energy -381.694476 (Hartree)

Frequencies (cm-1):

|         |         |         |         |         |         |         |         |
|---------|---------|---------|---------|---------|---------|---------|---------|
| 25.91   | 86.35   | 124.27  | 171.27  | 186.61  | 379.28  | 443.41  | 504.46  |
| 518.89  | 579.67  | 689.55  | 746.85  | 835.82  | 881.64  | 942.74  | 968.86  |
| 998.23  | 1091.36 | 1163.32 | 1180.33 | 1186.91 | 1304.94 | 1386.92 | 1423.46 |
| 1642.87 | 1708.78 | 1900.15 | 3096.35 | 3126.57 | 3274.32 | 3297.49 | 3760.72 |
| 3948.63 |         |         |         |         |         |         |         |

# **TS B-D**

| Atom | X        | Y        | Z (Angstrom) |
|------|----------|----------|--------------|
| 6    | 1.439162 | 1.138271 | 0.091130     |



|   |           |           |           |
|---|-----------|-----------|-----------|
| 6 | 0.064149  | 0.852902  | 0.490414  |
| 6 | -0.073105 | -0.553349 | 0.285648  |
| 8 | 1.061341  | -1.050264 | -0.240603 |
| 6 | 1.969379  | -0.009159 | -0.335419 |
| 8 | -1.106083 | -1.258635 | 0.344860  |
| 8 | -2.296859 | 0.628038  | -0.549497 |
| 1 | -0.393031 | 1.313818  | 1.357318  |
| 1 | 1.943474  | 2.088038  | 0.130974  |
| 1 | 2.932282  | -0.277802 | -0.729117 |
| 1 | -2.932583 | 1.079021  | 0.014135  |
| 1 | -2.010516 | -0.341120 | -0.105084 |
| 1 | -1.204331 | 1.012948  | -0.296947 |

Energy -381.637076 (Hartree)

Frequencies (cm-1):

|          |         |         |         |         |         |         |         |
|----------|---------|---------|---------|---------|---------|---------|---------|
| 1552.63i | 111.34  | 276.24  | 414.08  | 469.71  | 513.69  | 566.85  | 605.25  |
| 619.95   | 715.63  | 728.52  | 784.89  | 860.35  | 889.20  | 908.98  | 968.63  |
| 1033.43  | 1100.53 | 1174.58 | 1188.55 | 1273.17 | 1328.20 | 1396.46 | 1441.47 |
| 1526.57  | 1573.84 | 1649.20 | 1777.13 | 2094.23 | 3192.89 | 3279.41 | 3313.14 |
| 3893.00  |         |         |         |         |         |         |         |

#### D

| Atom | X         | Y         | Z (Angstrom) |
|------|-----------|-----------|--------------|
| 6    | -2.184425 | -0.113743 | -0.015220    |
| 6    | -1.283421 | -1.307187 | 0.000336     |
| 6    | -0.021462 | -0.903271 | 0.012511     |
| 6    | -0.020324 | 0.577576  | 0.006280     |
| 8    | -1.307443 | 1.002932  | -0.011981    |
| 8    | 0.903738  | 1.342604  | 0.015786     |
| 8    | 3.054530  | -0.532000 | 0.061633     |
| 1    | 0.897456  | -1.467016 | 0.024019     |
| 1    | -1.651041 | -2.321976 | 0.001668     |
| 1    | -2.828467 | -0.063342 | 0.864426     |
| 1    | 3.720586  | -0.381266 | -0.610598    |
| 1    | 2.523413  | 0.277333  | 0.081545     |
| 1    | -2.810748 | -0.072277 | -0.908002    |

Energy -381.698858 (Hartree)

Frequencies (cm-1):

|         |         |         |         |         |         |         |         |
|---------|---------|---------|---------|---------|---------|---------|---------|
| 33.24   | 68.88   | 128.33  | 172.19  | 208.63  | 326.76  | 362.75  | 517.67  |
| 585.41  | 695.30  | 711.65  | 806.71  | 848.55  | 916.47  | 964.59  | 1007.46 |
| 1045.94 | 1085.66 | 1152.03 | 1206.45 | 1224.61 | 1363.01 | 1393.60 | 1500.92 |
| 1647.28 | 1691.42 | 1872.08 | 3074.24 | 3112.89 | 3246.77 | 3273.48 | 3745.53 |
| 3944.88 |         |         |         |         |         |         |         |

#### TS C-D

| Atom | X         | Y         | Z (Angstrom) |
|------|-----------|-----------|--------------|
| 6    | 0.806260  | -1.047780 | -0.611835    |
| 6    | 0.878537  | -0.965165 | 0.759609     |
| 6    | -0.195624 | -0.167859 | 1.202062     |
| 6    | -1.082583 | 0.014825  | 0.073141     |
| 8    | -0.391729 | -0.504234 | -1.036966    |
| 8    | -2.152770 | 0.543213  | -0.064456    |
| 8    | 1.380061  | 1.525719  | -0.265601    |
| 1    | -0.488920 | 0.028494  | 2.218092     |
| 1    | 1.680382  | -1.371232 | 1.357589     |
| 1    | 1.304665  | -1.711449 | -1.297394    |
| 1    | 2.175549  | 1.833209  | 0.186193     |
| 1    | 1.521697  | 0.463415  | -0.535950    |
| 1    | 0.682589  | 1.235846  | 0.469792     |

Energy -381.604311 (Hartree)

Frequencies (cm-1):

|         |         |         |         |         |         |         |         |
|---------|---------|---------|---------|---------|---------|---------|---------|
| 968.42i | 131.51  | 239.16  | 404.52  | 443.27  | 480.38  | 517.22  | 522.92  |
| 610.67  | 654.67  | 716.04  | 764.00  | 785.12  | 850.38  | 886.74  | 926.26  |
| 1018.83 | 1107.30 | 1114.77 | 1162.94 | 1220.12 | 1301.52 | 1336.72 | 1446.00 |

1536.09    1632.82    1756.15    1860.25    2550.29    3240.58    3274.47    3287.07  
 3855.87

## Formation of furanones with 2 water molecules:

### A

| Atom | X         | Y         | Z (Angstrom) |
|------|-----------|-----------|--------------|
| 8    | 0.948718  | 2.056997  | 0.243327     |
| 8    | -0.316058 | -0.735348 | -0.020283    |
| 6    | 1.583566  | 1.093340  | 0.127366     |
| 6    | 2.370044  | 0.048065  | -0.012827    |
| 6    | 1.923639  | -1.339393 | -0.102642    |
| 6    | 0.642310  | -1.691768 | -0.094049    |
| 1    | -1.215974 | -1.092046 | 0.127391     |
| 8    | -2.034491 | 1.513567  | -0.399319    |
| 1    | -1.186416 | 1.079239  | -0.557848    |
| 1    | -1.813677 | 2.284114  | 0.128925     |
| 8    | -2.953826 | -0.970620 | 0.339642     |
| 1    | -2.908490 | -0.009245 | 0.185560     |
| 1    | -3.564634 | -1.313441 | -0.315352    |
| 1    | 0.313928  | -2.720721 | -0.150118    |
| 1    | 2.681832  | -2.101380 | -0.180278    |
| 1    | 3.421341  | 0.295246  | -0.052306    |

Energy -458.101961 (Hartree)

Frequencies (cm-1):

|         |         |         |         |         |         |         |         |
|---------|---------|---------|---------|---------|---------|---------|---------|
| 21.14   | 34.72   | 83.88   | 107.53  | 123.00  | 166.20  | 187.44  | 209.78  |
| 227.39  | 246.48  | 282.21  | 305.63  | 378.81  | 469.47  | 499.86  | 530.52  |
| 607.10  | 622.23  | 715.80  | 756.96  | 808.91  | 855.02  | 930.48  | 955.05  |
| 1101.67 | 1144.72 | 1255.95 | 1383.84 | 1419.27 | 1453.43 | 1632.26 | 1648.25 |
| 1758.73 | 2218.81 | 3213.15 | 3223.84 | 3258.39 | 3483.34 | 3638.21 | 3814.74 |
| 3934.20 | 3935.09 |         |         |         |         |         |         |

### TS A-B

| Atom | X         | Y         | Z (Angstrom) |
|------|-----------|-----------|--------------|
| 8    | -0.529914 | -1.566459 | -0.239557    |
| 8    | 0.485583  | 0.592357  | -0.592500    |
| 6    | 0.514005  | -0.993323 | -0.067131    |
| 6    | 1.789772  | -1.062470 | 0.386118     |
| 6    | 2.497709  | 0.184952  | 0.271778     |
| 6    | 1.726226  | 1.134397  | -0.259466    |
| 1    | -0.350460 | 1.102104  | -0.232349    |
| 8    | -2.987307 | -0.506498 | 0.133232     |
| 1    | -2.181321 | -1.052557 | 0.025428     |
| 1    | -3.550179 | -0.706674 | -0.617156    |
| 8    | -1.580794 | 1.687229  | 0.272943     |
| 1    | -2.245439 | 0.946848  | 0.219126     |
| 1    | -1.543580 | 1.959835  | 1.193066     |
| 1    | 1.901903  | 2.161346  | -0.524153    |
| 1    | 2.178374  | -1.978853 | 0.791808     |
| 1    | 3.523886  | 0.333579  | 0.563495     |

Energy -458.087519 (Hartree)

Frequencies (cm-1):

|         |         |         |         |         |         |         |         |
|---------|---------|---------|---------|---------|---------|---------|---------|
| 164.01i | 25.40   | 63.23   | 93.90   | 202.58  | 260.19  | 267.30  | 301.54  |
| 366.90  | 373.02  | 418.62  | 501.16  | 553.09  | 581.32  | 625.02  | 647.90  |
| 683.46  | 711.64  | 721.30  | 854.21  | 916.41  | 1011.59 | 1031.77 | 1065.03 |
| 1112.81 | 1154.65 | 1179.08 | 1343.87 | 1404.61 | 1520.16 | 1641.49 | 1660.10 |
| 1667.96 | 1916.84 | 2406.61 | 3179.94 | 3267.75 | 3291.03 | 3301.89 | 3531.84 |
| 3914.51 | 3930.55 |         |         |         |         |         |         |

**B**

| Atom | X         | Y         | Z (Angstrom) |
|------|-----------|-----------|--------------|
| 8    | 0.287579  | -1.514350 | -0.569949    |
| 8    | -0.341948 | 0.574395  | 0.136735     |
| 6    | -0.688379 | -0.693340 | -0.224983    |
| 6    | -2.032926 | -0.840096 | -0.202621    |
| 6    | -2.560269 | 0.432775  | 0.201821     |
| 6    | -1.510818 | 1.249382  | 0.401896     |
| 1    | 1.339438  | 1.381088  | -0.459963    |
| 8    | 2.528053  | -0.922949 | 0.719815     |
| 1    | 1.111793  | -1.339247 | -0.046730    |
| 1    | 2.517626  | -0.840105 | 1.675349     |
| 8    | 2.296885  | 1.508652  | -0.507690    |
| 1    | 2.674102  | -0.026503 | 0.363088     |
| 1    | 2.513238  | 1.546891  | -1.441781    |
| 1    | -3.595795 | 0.692803  | 0.335252     |
| 1    | -2.568178 | -1.741248 | -0.437066    |
| 1    | -1.402419 | 2.268003  | 0.723888     |

Energy -458.128841 (Hartree)

Frequencies (cm<sup>-1</sup>):

| 28.87   | 30.52   | 75.70   | 141.91  | 213.56  | 218.57  | 240.30  | 267.16  |
|---------|---------|---------|---------|---------|---------|---------|---------|
| 303.34  | 321.43  | 432.95  | 469.09  | 532.19  | 619.17  | 677.40  | 700.33  |
| 731.20  | 766.12  | 804.37  | 897.55  | 899.48  | 953.96  | 975.81  | 1025.56 |
| 1114.99 | 1187.82 | 1228.59 | 1301.07 | 1373.89 | 1458.00 | 1606.62 | 1626.35 |
| 1642.17 | 1725.72 | 3230.83 | 3281.01 | 3306.27 | 3316.83 | 3593.59 | 3778.23 |
| 3932.32 | 3935.58 |         |         |         |         |         |         |

**TS B-C**

| Atom | X         | Y         | Z (Angstrom) |
|------|-----------|-----------|--------------|
| 8    | 0.553405  | -1.547782 | 0.191732     |
| 8    | -1.478923 | -0.968843 | -0.553724    |
| 6    | -0.375990 | -0.715448 | 0.193925     |
| 6    | -0.506037 | 0.573152  | 0.780216     |
| 6    | -1.850059 | 1.012336  | 0.421317     |
| 6    | -2.359931 | 0.080103  | -0.387004    |
| 1    | 0.567974  | 1.234581  | -0.099228    |
| 8    | 2.711250  | -0.394264 | 0.145482     |
| 1    | 1.820304  | -0.976080 | 0.248165     |
| 1    | 3.281964  | -0.847435 | -0.480231    |
| 8    | 1.526631  | 1.549589  | -0.619340    |
| 1    | 2.205017  | 0.686630  | -0.307351    |
| 1    | 1.826483  | 2.383486  | -0.243646    |
| 1    | -3.288219 | -0.006959 | -0.921082    |
| 1    | -2.336049 | 1.926589  | 0.715625     |
| 1    | -0.024274 | 0.788735  | 1.723818     |

Energy -458.092767 (Hartree)

Frequencies (cm<sup>-1</sup>):

| 1155.93i | 50.17   | 85.96   | 119.35  | 266.22  | 377.37  | 404.75  | 432.69  |
|----------|---------|---------|---------|---------|---------|---------|---------|
| 485.50   | 544.70  | 596.29  | 608.06  | 655.06  | 662.73  | 727.67  | 752.73  |
| 787.41   | 871.91  | 887.30  | 905.70  | 964.72  | 1021.10 | 1108.08 | 1143.06 |
| 1182.55  | 1203.14 | 1250.60 | 1316.21 | 1401.30 | 1451.99 | 1569.85 | 1614.70 |
| 1658.12  | 1674.95 | 1727.76 | 1839.26 | 2216.75 | 3216.58 | 3272.67 | 3306.74 |
| 3881.52  | 3909.18 |         |         |         |         |         |         |

**C**

| Atom | X         | Y         | Z (Angstrom) |
|------|-----------|-----------|--------------|
| 8    | 0.634777  | -1.582979 | 0.532089     |
| 8    | -0.233152 | -0.258623 | -1.046761    |
| 6    | -0.245313 | -0.853532 | 0.182891     |
| 6    | -1.501420 | -0.433412 | 0.909938     |
| 6    | -2.159319 | 0.460732  | -0.093470    |
| 6    | -1.377762 | 0.516510  | -1.156293    |
| 1    | -1.199229 | 0.085385  | 1.819366     |

|                              |           |           |           |         |         |         |         |
|------------------------------|-----------|-----------|-----------|---------|---------|---------|---------|
| 8                            | 2.758791  | 0.043187  | -0.462530 |         |         |         |         |
| 1                            | 2.290079  | -0.745071 | -0.150985 |         |         |         |         |
| 1                            | 2.496218  | 0.120062  | -1.383168 |         |         |         |         |
| 8                            | 0.834314  | 1.605173  | 0.900946  |         |         |         |         |
| 1                            | 1.591356  | 1.197408  | 0.446525  |         |         |         |         |
| 1                            | 1.203948  | 2.019193  | 1.682387  |         |         |         |         |
| 1                            | -1.466934 | 1.054383  | -2.083944 |         |         |         |         |
| 1                            | -3.089046 | 0.986585  | 0.033119  |         |         |         |         |
| 1                            | -2.081343 | -1.313794 | 1.188353  |         |         |         |         |
| Energy -458.137219 (Hartree) |           |           |           |         |         |         |         |
| Frequencies (cm-1):          |           |           |           |         |         |         |         |
| 63.45                        | 86.66     | 101.50    | 136.59    | 157.73  | 177.89  | 213.85  | 218.74  |
| 236.47                       | 262.26    | 427.82    | 437.52    | 510.90  | 552.34  | 587.75  | 690.60  |
| 739.08                       | 777.39    | 840.58    | 878.28    | 942.42  | 971.78  | 994.59  | 1091.84 |
| 1161.78                      | 1180.05   | 1189.25   | 1298.64   | 1386.90 | 1428.58 | 1647.18 | 1658.80 |
| 1717.47                      | 1900.73   | 3093.93   | 3137.80   | 3276.21 | 3299.66 | 3649.83 | 3761.92 |
| 3921.96                      | 3935.65   |           |           |         |         |         |         |

# TS B-D

| Atom                         | X         | Y         | Z (Angstrom) |         |         |         |         |
|------------------------------|-----------|-----------|--------------|---------|---------|---------|---------|
| 8                            | -0.728427 | -1.815938 | -0.038150    |         |         |         |         |
| 8                            | 0.309828  | -0.168441 | 1.072962     |         |         |         |         |
| 6                            | 0.254020  | -1.058051 | 0.044556     |         |         |         |         |
| 6                            | 1.341770  | -0.796463 | -0.828667    |         |         |         |         |
| 6                            | 1.983409  | 0.322086  | -0.342591    |         |         |         |         |
| 6                            | 1.285990  | 0.794783  | 0.776288     |         |         |         |         |
| 1                            | 0.212780  | 1.622028  | 0.029726     |         |         |         |         |
| 8                            | -2.384973 | 0.075363  | -0.094052    |         |         |         |         |
| 1                            | -1.836809 | -0.800343 | -0.042639    |         |         |         |         |
| 1                            | -2.849038 | 0.163021  | 0.743018     |         |         |         |         |
| 8                            | -0.775442 | 1.865704  | -0.452561    |         |         |         |         |
| 1                            | -1.524923 | 1.056651  | -0.272673    |         |         |         |         |
| 1                            | -0.641690 | 1.972179  | -1.400223    |         |         |         |         |
| 1                            | 1.697142  | 1.297902  | 1.637259     |         |         |         |         |
| 1                            | 2.842288  | 0.815100  | -0.772101    |         |         |         |         |
| 1                            | 1.541242  | -1.354168 | -1.725477    |         |         |         |         |
| Energy -458.088214 (Hartree) |           |           |              |         |         |         |         |
| Frequencies (cm-1):          |           |           |              |         |         |         |         |
| 1009.27i                     | 68.42     | 110.93    | 175.22       | 295.75  | 343.29  | 363.48  | 427.26  |
| 451.47                       | 518.12    | 540.41    | 579.67       | 659.41  | 715.81  | 735.67  | 763.51  |
| 813.65                       | 862.42    | 910.77    | 946.26       | 991.02  | 1047.09 | 1095.43 | 1102.20 |
| 1162.23                      | 1197.49   | 1286.05   | 1337.78      | 1444.04 | 1456.99 | 1530.09 | 1584.75 |
| 1640.69                      | 1709.79   | 1723.85   | 1793.63      | 2592.82 | 3238.73 | 3253.24 | 3298.54 |
| 3879.15                      | 3903.10   |           |              |         |         |         |         |

# D

| Atom | X         | Y         | Z (Angstrom) |
|------|-----------|-----------|--------------|
| 8    | -0.587713 | -1.736989 | -0.345242    |
| 8    | 0.211892  | -0.140561 | 1.002233     |
| 6    | 0.281523  | -0.950748 | -0.079662    |
| 6    | 1.545654  | -0.668768 | -0.786094    |
| 6    | 2.140424  | 0.341030  | -0.169017    |
| 6    | 1.300358  | 0.775220  | 0.986679     |
| 1    | 0.901575  | 1.778533  | 0.829482     |
| 8    | -2.751874 | -0.010973 | 0.301605     |
| 1    | -2.225942 | -0.798565 | 0.091441     |
| 1    | -2.591042 | 0.128991  | 1.238024     |
| 8    | -0.834882 | 1.686345  | -0.891325    |
| 1    | -1.579497 | 1.189120  | -0.509287    |
| 1    | -1.149843 | 2.003002  | -1.739030    |
| 1    | 1.848190  | -1.209771 | -1.665908    |
| 1    | 3.067130  | 0.824816  | -0.436860    |
| 1    | 1.822287  | 0.720887  | 1.942542     |

Energy -458.142888 (Hartree)  
 Frequencies (cm-1):  
 52.22 79.54 91.70 148.69 176.98 182.48 210.68 222.04  
 251.98 281.89 363.40 431.64 514.26 587.73 680.25 714.46  
 784.90 807.62 843.25 918.12 965.43 978.66 1040.85 1081.40  
 1148.40 1205.73 1237.97 1368.38 1399.67 1478.16 1650.26 1655.70  
 1691.64 1864.18 3081.53 3128.71 3248.48 3288.09 3628.20 3732.83  
 3920.07 3939.45

## Formation of maleic anhydride without water molecules:

### Singlet O<sub>2</sub>

Atom X Y Z (Angstrom)  
 8 0.000000 0.000000 0.594632  
 8 0.000000 0.000000 -0.594632  
 Energy -150.298750 (Hartree)  
 Frequencies (cm-1):  
 1753.05

### B

Atom X Y Z (Angstrom)  
 6 -1.468769 0.642813 -0.000003  
 6 -1.362997 -0.699590 -0.000007  
 8 -0.043845 -1.066139 -0.000002  
 6 0.667212 0.064979 0.000007  
 6 -0.128411 1.161422 0.000008  
 8 1.992640 -0.137049 0.000020  
 1 2.435243 0.715417 -0.000189  
 1 -2.383409 1.209287 -0.000004  
 1 -2.071198 -1.506432 -0.000009  
 1 0.186793 2.189490 0.000024  
 Energy -305.242255 (Hartree)  
 Frequencies (cm-1):  
 223.03 303.35 438.74 621.36 687.54 699.67 741.52 777.95  
 890.90 902.35 995.29 1028.14 1111.94 1169.69 1206.68 1275.30  
 1340.23 1506.29 1597.94 1676.65 3281.42 3293.57 3320.30 3903.11

### TS B-E

Atom X Y Z (Angstrom)  
 8 1.267927 -1.314343 -0.111419  
 6 1.097854 0.556595 0.789668  
 8 -0.160829 0.214667 1.151668  
 6 -0.881063 0.288549 0.021570  
 8 0.114028 -1.463270 -0.588321  
 6 -0.203110 1.026368 -0.946189  
 6 1.071856 1.207488 -0.438063  
 8 -2.154602 -0.058955 0.068757  
 1 -2.234134 -0.877174 0.576221  
 1 1.927374 1.626909 -0.936334  
 1 1.847849 0.494134 1.555622  
 1 -0.586504 1.257332 -1.922908  
 Energy -455.522928 (Hartree)  
 Frequencies (cm-1):  
 598.57i 157.41 201.38 262.65 314.81 362.60 447.69 534.86  
 594.52 616.49 706.28 785.38 852.58 893.21 926.48 973.70  
 1058.04 1119.30 1168.12 1208.21 1292.20 1303.73 1396.14 1496.71  
 1518.63 1632.60 3290.47 3308.66 3318.73 3821.05

**E**

| Atom | X         | Y         | Z (Angstrom) |
|------|-----------|-----------|--------------|
| 6    | -1.213932 | -0.193540 | -0.561669    |
| 8    | 0.032357  | -0.215750 | -1.198522    |
| 6    | 0.742618  | 0.129638  | -0.028096    |
| 6    | 0.031426  | 1.368477  | 0.464471     |
| 6    | -1.233304 | 1.163615  | 0.123784     |
| 8    | 2.078248  | 0.156412  | -0.139331    |
| 1    | 2.376750  | -0.726334 | -0.392924    |
| 1    | -2.116006 | 1.718156  | 0.396110     |
| 1    | -2.033575 | -0.515115 | -1.191804    |
| 1    | 0.479274  | 2.122701  | 1.089870     |
| 8    | 0.334166  | -0.944457 | 0.865304     |
| 8    | -1.028181 | -1.172272 | 0.486026     |

Energy -455.583838 (Hartree)

Frequencies (cm-1):

|         |         |         |         |         |         |         |         |
|---------|---------|---------|---------|---------|---------|---------|---------|
| 305.05  | 323.90  | 392.71  | 426.25  | 461.54  | 555.19  | 684.17  | 702.06  |
| 736.18  | 753.55  | 843.62  | 878.78  | 904.33  | 949.28  | 977.15  | 990.95  |
| 1002.09 | 1052.91 | 1081.23 | 1145.72 | 1278.46 | 1305.45 | 1338.13 | 1366.77 |
| 1488.30 | 1674.54 | 3204.63 | 3261.59 | 3285.45 | 3829.50 |         |         |

**TS E-int1**

| Atom | X         | Y         | Z (Angstrom) |
|------|-----------|-----------|--------------|
| 6    | -0.153246 | 1.360741  | -0.435905    |
| 6    | 1.122346  | 1.257246  | -0.109996    |
| 6    | 1.261894  | -0.115493 | 0.545122     |
| 8    | -0.004740 | -0.328535 | 1.120225     |
| 6    | -0.782054 | 0.052596  | 0.004340     |
| 8    | 1.416941  | -1.091452 | -0.437547    |
| 8    | -2.115231 | 0.071664  | 0.242360     |
| 8    | -0.504237 | -0.934886 | -0.978843    |
| 1    | -2.381911 | -0.816497 | 0.512496     |
| 1    | 1.947947  | 1.904943  | -0.354975    |
| 1    | 2.066103  | -0.261702 | 1.268601     |
| 1    | -0.667651 | 2.108391  | -1.017044    |

Energy -455.531103 (Hartree)

Frequencies (cm-1):

|         |         |         |         |         |         |         |         |
|---------|---------|---------|---------|---------|---------|---------|---------|
| 501.50i | 270.05  | 330.79  | 383.56  | 419.76  | 444.80  | 518.92  | 620.69  |
| 669.08  | 696.40  | 758.06  | 834.13  | 864.44  | 926.53  | 970.60  | 991.45  |
| 1010.10 | 1044.36 | 1068.41 | 1115.23 | 1248.41 | 1277.18 | 1311.96 | 1329.22 |
| 1448.43 | 1695.91 | 3104.18 | 3257.66 | 3281.67 | 3827.42 |         |         |

**intermediate1**

| Atom | X         | Y         | Z (Angstrom) |
|------|-----------|-----------|--------------|
| 6    | 1.371739  | -0.103626 | 0.490010     |
| 8    | 0.161621  | -0.819984 | 0.489094     |
| 6    | -0.878901 | -0.036664 | -0.062571    |
| 6    | -0.261959 | 1.309422  | -0.318180    |
| 6    | 1.019191  | 1.272799  | -0.010419    |
| 8    | -1.953198 | 0.038343  | 0.806230     |
| 1    | -2.248316 | -0.863851 | 0.985702     |
| 1    | 1.748200  | 2.062081  | -0.106994    |
| 1    | 1.802037  | -0.115329 | 1.495126     |
| 1    | -0.843304 | 2.118222  | -0.730707    |
| 8    | -1.399378 | -0.643666 | -1.179498    |
| 8    | 2.196075  | -0.806282 | -0.395347    |

Energy -455.542077 (Hartree)

Frequencies (cm-1):

|         |         |         |         |         |         |         |         |
|---------|---------|---------|---------|---------|---------|---------|---------|
| 77.01   | 188.79  | 279.59  | 353.61  | 359.92  | 385.43  | 485.61  | 554.69  |
| 612.51  | 691.02  | 770.66  | 835.30  | 863.76  | 972.94  | 1002.16 | 1035.75 |
| 1098.68 | 1117.68 | 1123.16 | 1146.84 | 1200.31 | 1313.22 | 1361.72 | 1433.22 |
| 1442.65 | 1723.77 | 3071.30 | 3248.34 | 3272.61 | 3825.04 |         |         |

**TS int1-int2**

| Atom | X         | Y         | Z (Angstrom) |
|------|-----------|-----------|--------------|
| 6    | 1.096737  | 1.220327  | 0.026617     |
| 6    | 1.410442  | -0.220790 | 0.401911     |
| 8    | 0.155217  | -0.881117 | 0.379432     |
| 6    | -0.847264 | -0.011568 | -0.001858    |
| 6    | -0.193672 | 1.319556  | -0.215457    |
| 8    | 2.320738  | -0.732959 | -0.436803    |
| 8    | -1.966214 | -0.039659 | 0.834088     |
| 8    | -1.667264 | -0.484303 | -1.027672    |
| 1    | -2.468722 | -0.594362 | -0.123295    |
| 1    | 1.867637  | 1.970090  | -0.039656    |
| 1    | 1.825770  | -0.301513 | 1.419403     |
| 1    | -0.761960 | 2.184939  | -0.516085    |

Energy -455.515655 (Hartree)

Frequencies (cm-1):

|          |         |         |         |         |         |         |         |
|----------|---------|---------|---------|---------|---------|---------|---------|
| 1905.35i | 79.92   | 182.81  | 329.83  | 376.86  | 461.79  | 500.13  | 577.43  |
| 587.46   | 635.01  | 758.88  | 796.37  | 857.68  | 903.76  | 939.38  | 986.35  |
| 991.08   | 1050.97 | 1097.54 | 1128.35 | 1165.77 | 1199.70 | 1265.72 | 1332.44 |
| 1383.41  | 1720.91 | 2274.16 | 2973.85 | 3258.76 | 3281.98 |         |         |

**intermediate2**

| Atom | X         | Y         | Z (Angstrom) |
|------|-----------|-----------|--------------|
| 6    | 1.044035  | 1.229216  | -0.068728    |
| 6    | 1.373163  | -0.168852 | 0.436170     |
| 8    | 0.119895  | -0.821277 | 0.533613     |
| 6    | -0.902573 | -0.015434 | 0.022976     |
| 6    | -0.245021 | 1.294575  | -0.325303    |
| 8    | 2.245696  | -0.755978 | -0.397066    |
| 8    | -1.922209 | 0.076442  | 0.945121     |
| 8    | -1.523606 | -0.564238 | -1.088499    |
| 1    | 1.808745  | 1.975148  | -0.209594    |
| 1    | 1.835073  | -0.157388 | 1.435801     |
| 1    | -0.816625 | 2.123382  | -0.711091    |
| 1    | -1.803032 | -1.457761 | -0.851148    |

Energy -455.556831 (Hartree)

Frequencies (cm-1):

|         |         |         |         |         |         |         |         |
|---------|---------|---------|---------|---------|---------|---------|---------|
| 71.27   | 173.64  | 251.48  | 337.44  | 359.58  | 402.14  | 498.50  | 556.04  |
| 583.25  | 688.61  | 753.10  | 798.54  | 875.08  | 906.37  | 992.10  | 1029.70 |
| 1087.58 | 1094.19 | 1114.51 | 1128.42 | 1171.18 | 1213.18 | 1294.88 | 1335.02 |
| 1433.02 | 1722.18 | 2984.76 | 3255.36 | 3279.43 | 3828.81 |         |         |

**TS int2-int3**

| Atom | X         | Y         | Z (Angstrom) |
|------|-----------|-----------|--------------|
| 6    | -0.898288 | -0.041923 | -0.031341    |
| 6    | -0.401402 | 1.394584  | -0.089364    |
| 6    | 0.912301  | 1.317064  | -0.006746    |
| 6    | 1.232852  | -0.188868 | 0.000705     |
| 8    | 0.122479  | -0.781892 | -0.650970    |
| 8    | 2.375513  | -0.689774 | -0.110060    |
| 8    | -0.895739 | -0.479265 | 1.316658     |
| 8    | -2.135250 | -0.249293 | -0.548512    |
| 1    | 1.674208  | 2.070566  | 0.099152     |
| 1    | 0.903005  | -0.416851 | 1.176580     |
| 1    | -1.051175 | 2.254498  | -0.095058    |
| 1    | -2.334833 | -1.191567 | -0.477120    |

Energy -455.526325 (Hartree)

Frequencies (cm-1):

|          |         |         |         |         |         |         |         |
|----------|---------|---------|---------|---------|---------|---------|---------|
| 1607.18i | 261.60  | 292.23  | 304.12  | 356.44  | 407.14  | 461.84  | 505.40  |
| 594.86   | 634.06  | 682.17  | 704.44  | 771.71  | 825.11  | 864.58  | 892.75  |
| 953.20   | 981.53  | 1044.86 | 1046.92 | 1149.42 | 1268.33 | 1300.53 | 1406.46 |
| 1432.65  | 1676.87 | 1706.80 | 3260.62 | 3287.40 | 3829.23 |         |         |

**intermediate3**

| Atom | X         | Y         | Z (Angstrom) |
|------|-----------|-----------|--------------|
| 6    | 1.028907  | 1.254540  | -0.054435    |
| 6    | 1.393964  | -0.186621 | 0.021131     |
| 8    | 0.233561  | -0.910332 | 0.029056     |
| 6    | -0.894522 | -0.034217 | 0.013277     |
| 6    | -0.287382 | 1.349020  | -0.058277    |
| 8    | 2.469370  | -0.690898 | 0.054623     |
| 8    | -1.637865 | -0.147144 | 1.153390     |
| 8    | -1.697009 | -0.371091 | -1.067399    |
| 1    | -2.116842 | -0.983622 | 1.111298     |
| 1    | 1.775186  | 2.030175  | -0.093805    |
| 1    | -0.915708 | 2.224719  | -0.095843    |
| 1    | -1.132894 | -0.611882 | -1.809191    |

Energy -455.733132 (Hartree)

Frequencies (cm-1):

|         |         |         |         |         |         |         |         |
|---------|---------|---------|---------|---------|---------|---------|---------|
| 115.18  | 198.08  | 248.00  | 301.84  | 403.10  | 412.33  | 459.86  | 567.29  |
| 576.18  | 686.69  | 723.88  | 747.50  | 858.92  | 872.47  | 959.41  | 1007.53 |
| 1038.67 | 1086.23 | 1138.75 | 1174.05 | 1242.76 | 1336.73 | 1376.18 | 1461.02 |
| 1714.47 | 1927.23 | 3258.25 | 3284.40 | 3838.05 | 3873.71 |         |         |

**TS int3-F**

| Atom | X         | Y         | Z (Angstrom) |
|------|-----------|-----------|--------------|
| 6    | 0.818163  | 0.041850  | -0.239821    |
| 6    | 0.208746  | 1.380964  | 0.056519     |
| 6    | -1.101563 | 1.239467  | 0.149978     |
| 6    | -1.425638 | -0.200870 | -0.029916    |
| 8    | -0.244126 | -0.865755 | -0.280811    |
| 8    | -2.471437 | -0.757181 | 0.019879     |
| 8    | 1.804397  | -0.128618 | -1.040484    |
| 8    | 1.706797  | -0.404485 | 1.099242     |
| 1    | 2.308744  | -0.516627 | 0.096621     |
| 1    | -1.865934 | 1.976758  | 0.329423     |
| 1    | 0.817983  | 2.266898  | 0.130961     |
| 1    | 1.375900  | -1.247185 | 1.439822     |

Energy -455.662271 (Hartree)

Frequencies (cm-1):

|          |         |         |         |         |         |         |         |
|----------|---------|---------|---------|---------|---------|---------|---------|
| 1656.36i | 120.04  | 191.41  | 301.38  | 384.67  | 398.18  | 484.45  | 551.13  |
| 580.74   | 674.53  | 707.54  | 763.00  | 832.41  | 873.34  | 893.98  | 929.32  |
| 958.08   | 1005.43 | 1076.46 | 1107.08 | 1292.15 | 1333.16 | 1342.80 | 1560.43 |
| 1704.92  | 1939.62 | 2076.93 | 3265.84 | 3288.18 | 3818.20 |         |         |

**F**

| Atom | X         | Y         | Z (Angstrom) |
|------|-----------|-----------|--------------|
| 6    | 0.661714  | 1.255844  | 0.000000     |
| 6    | 1.121775  | -0.162477 | -0.000000    |
| 8    | -0.000000 | -0.964313 | 0.000000     |
| 6    | -0.661714 | 1.255844  | -0.000000    |
| 6    | -1.121775 | -0.162476 | -0.000000    |
| 8    | -2.222913 | -0.597813 | 0.000000     |
| 1    | -1.356309 | 2.079547  | 0.000000     |
| 1    | 1.356310  | 2.079547  | 0.000000     |
| 8    | 2.222913  | -0.597813 | 0.000000     |

Energy -379.295342 (Hartree)

Frequencies (cm-1):

|         |         |         |         |         |         |         |         |
|---------|---------|---------|---------|---------|---------|---------|---------|
| 166.40  | 271.13  | 413.70  | 566.74  | 650.47  | 653.68  | 715.46  | 797.77  |
| 883.09  | 893.25  | 961.60  | 1014.93 | 1076.54 | 1089.83 | 1311.70 | 1336.73 |
| 1693.55 | 1910.43 | 1978.87 | 3265.64 | 3286.84 |         |         |         |



## Formation of maleic anhydride with 2 water molecules:

### Singlet O<sub>2</sub>

| Atom | X        | Y        | Z (Angstrom) |
|------|----------|----------|--------------|
| 8    | 0.000000 | 0.000000 | 0.594632     |
| 8    | 0.000000 | 0.000000 | -0.594632    |

Energy -150.298750 (Hartree)

Frequencies (cm<sup>-1</sup>):

1753.05

### B

| Atom | X         | Y         | Z (Angstrom) |
|------|-----------|-----------|--------------|
| 6    | -1.277937 | -0.368040 | -0.230405    |
| 6    | -1.650436 | 0.646763  | 0.582602     |
| 6    | -0.703042 | 1.697852  | 0.310284     |
| 6    | 0.146793  | 1.231612  | -0.628465    |
| 8    | -0.206006 | -0.047482 | -0.969317    |
| 8    | -1.770620 | -1.601892 | -0.393163    |
| 8    | 2.839992  | -0.219541 | -0.695931    |
| 8    | 1.254301  | -0.668482 | 1.674274     |
| 1    | -2.481282 | 0.649382  | 1.263090     |
| 1    | -1.290483 | -2.033488 | -1.108648    |
| 1    | 1.026437  | 1.608555  | -1.114029    |
| 1    | 0.611924  | -1.369572 | 1.806762     |
| 1    | 0.724684  | 0.128292  | 1.546862     |
| 1    | 3.724516  | -0.085671 | -0.351548    |
| 1    | 2.323868  | -0.521788 | 0.065275     |
| 1    | -0.673269 | 2.674351  | 0.761230     |

Energy -458.116742 (Hartree)

Frequencies (cm<sup>-1</sup>):

|         |         |         |         |         |         |         |         |
|---------|---------|---------|---------|---------|---------|---------|---------|
| 39.66   | 51.81   | 96.77   | 107.22  | 134.93  | 151.82  | 175.28  | 192.55  |
| 201.91  | 256.98  | 302.23  | 323.29  | 432.36  | 454.20  | 624.18  | 665.85  |
| 692.92  | 699.14  | 768.50  | 801.37  | 900.95  | 906.72  | 993.63  | 1022.38 |
| 1108.01 | 1177.00 | 1203.42 | 1281.51 | 1328.21 | 1476.02 | 1591.48 | 1617.55 |
| 1649.73 | 1712.35 | 3281.56 | 3305.53 | 3331.50 | 3750.37 | 3817.29 | 3858.71 |
| 3933.47 | 3938.48 |         |         |         |         |         |         |

### TS B-E

| Atom | X         | Y         | Z (Angstrom) |
|------|-----------|-----------|--------------|
| 6    | -0.304258 | -0.631286 | 1.052562     |
| 6    | 0.610398  | 0.376370  | 1.326274     |
| 6    | 1.079576  | 0.791456  | 0.082359     |
| 8    | 0.332436  | 0.261666  | -0.903736    |
| 6    | -0.335670 | -0.769232 | -0.329966    |
| 8    | 1.889781  | 1.792593  | -0.221465    |
| 8    | 2.295951  | -0.914423 | -0.083670    |
| 8    | 1.469072  | -1.828057 | -0.325747    |
| 8    | -3.259433 | -1.041880 | -0.157135    |
| 8    | -2.358862 | 1.689805  | -0.086696    |
| 1    | 2.409463  | 1.542940  | -0.997268    |
| 1    | -0.817946 | -1.277170 | 1.741547     |
| 1    | -0.976054 | -1.351551 | -0.965412    |
| 1    | 1.018699  | 0.688012  | 2.270361     |
| 1    | -3.133614 | -0.081464 | -0.150362    |
| 1    | -4.207441 | -1.181024 | -0.178478    |
| 1    | -1.841849 | 1.838585  | -0.883148    |
| 1    | -1.703084 | 1.540180  | 0.602976     |

Energy -608.395070 (Hartree)

Frequencies (cm<sup>-1</sup>):

|         |        |        |        |         |         |         |         |
|---------|--------|--------|--------|---------|---------|---------|---------|
| 580.96i | 24.61  | 42.10  | 58.44  | 111.94  | 128.90  | 159.11  | 163.94  |
| 195.95  | 201.64 | 204.64 | 212.72 | 267.68  | 293.92  | 314.04  | 361.60  |
| 437.95  | 455.08 | 531.13 | 595.79 | 614.59  | 652.15  | 705.59  | 792.16  |
| 870.66  | 891.89 | 924.78 | 971.55 | 1055.99 | 1119.15 | 1169.17 | 1200.86 |

|         |         |         |         |         |         |         |         |
|---------|---------|---------|---------|---------|---------|---------|---------|
| 1288.83 | 1303.10 | 1387.19 | 1495.21 | 1508.10 | 1627.15 | 1629.12 | 1645.38 |
| 3293.89 | 3307.10 | 3326.32 | 3735.90 | 3814.07 | 3837.26 | 3932.46 | 3941.56 |

# E

| Atom | X         | Y         | Z (Angstrom) |
|------|-----------|-----------|--------------|
| 8    | 1.033648  | -1.717263 | -0.456810    |
| 6    | -0.173078 | -0.938026 | -0.344751    |
| 8    | 0.248851  | 0.300198  | -0.878229    |
| 6    | 1.292740  | 0.455328  | 0.076033     |
| 8    | 2.051511  | -0.751660 | -0.160899    |
| 6    | -0.356749 | -0.627470 | 1.130666     |
| 6    | 0.583825  | 0.269252  | 1.397735     |
| 8    | 2.068984  | 1.536691  | -0.088645    |
| 8    | -3.130096 | -0.832573 | -0.021125    |
| 8    | -2.176536 | 1.799740  | -0.305602    |
| 1    | 2.532125  | 1.451252  | -0.932173    |
| 1    | -1.037802 | -1.146746 | 1.783025     |
| 1    | -0.972578 | -1.411795 | -0.897417    |
| 1    | 0.926475  | 0.676140  | 2.334608     |
| 1    | -2.979799 | 0.121809  | -0.123635    |
| 1    | -4.008487 | -0.997728 | -0.366903    |
| 1    | -1.312233 | 1.513963  | -0.632651    |
| 1    | -1.999026 | 2.157525  | 0.567532     |

Energy -608.462134 (Hartree)

Frequencies (cm-1):

|         |         |         |         |         |         |         |         |
|---------|---------|---------|---------|---------|---------|---------|---------|
| 34.28   | 51.53   | 80.13   | 132.08  | 143.72  | 169.91  | 211.46  | 222.41  |
| 283.93  | 308.40  | 337.29  | 369.42  | 396.45  | 433.85  | 463.70  | 555.36  |
| 572.49  | 686.90  | 706.42  | 729.50  | 742.64  | 757.67  | 832.91  | 877.87  |
| 912.88  | 955.44  | 986.96  | 1000.36 | 1008.31 | 1042.80 | 1079.55 | 1131.63 |
| 1267.88 | 1314.62 | 1335.49 | 1358.05 | 1483.11 | 1639.13 | 1645.78 | 1672.51 |
| 3232.68 | 3266.58 | 3292.20 | 3667.73 | 3776.07 | 3822.80 | 3926.43 | 3939.48 |

# TS E-F

| Atom | X         | Y         | Z (Angstrom) |
|------|-----------|-----------|--------------|
| 6    | -1.279200 | -0.428015 | -0.085686    |
| 6    | -1.041954 | 0.005304  | 1.338103     |
| 6    | -0.223130 | 1.042351  | 1.357022     |
| 6    | 0.205747  | 1.383772  | -0.039435    |
| 8    | -0.471015 | 0.417240  | -0.872793    |
| 8    | 0.382000  | 2.546502  | -0.476736    |
| 8    | -0.924183 | -1.779065 | -0.255938    |
| 8    | -2.506969 | -0.201011 | -0.595895    |
| 1    | -1.275151 | -2.043510 | -1.116543    |
| 1    | 0.111981  | 1.621888  | 2.202353     |
| 1    | 1.414097  | 0.911196  | -0.099053    |
| 1    | -1.548456 | -0.467842 | 2.164591     |
| 8    | 2.644763  | 0.279766  | -0.197177    |
| 1    | 2.406852  | -0.686797 | -0.102643    |
| 1    | 2.958617  | 0.422316  | -1.096385    |
| 8    | 1.779043  | -2.151469 | 0.109117     |
| 1    | 0.811484  | -2.097109 | -0.014399    |
| 1    | 1.922682  | -2.576312 | 0.957433     |

Energy -608.428119 (Hartree)

Frequencies (cm-1):

|          |         |         |         |         |         |         |         |
|----------|---------|---------|---------|---------|---------|---------|---------|
| 1452.69i | 37.37   | 68.38   | 83.40   | 122.44  | 184.45  | 224.27  | 253.25  |
| 312.83   | 323.33  | 345.31  | 365.45  | 384.73  | 431.98  | 462.38  | 474.56  |
| 508.87   | 555.32  | 592.74  | 620.82  | 692.51  | 737.18  | 756.74  | 822.25  |
| 835.96   | 875.16  | 976.11  | 988.43  | 1001.28 | 1027.53 | 1123.83 | 1138.03 |
| 1180.93  | 1209.21 | 1305.15 | 1328.38 | 1434.97 | 1537.24 | 1626.10 | 1649.07 |
| 1699.73  | 3112.95 | 3248.13 | 3272.11 | 3558.53 | 3818.20 | 3881.87 | 3927.16 |

**F**

| Atom | X         | Y         | Z (Angstrom) |
|------|-----------|-----------|--------------|
| 6    | 0.732436  | 1.129604  | 0.370587     |
| 8    | 0.308939  | 0.675887  | -0.854766    |
| 6    | -1.075360 | 0.585626  | -0.836627    |
| 6    | -1.532678 | 1.040410  | 0.504579     |
| 6    | -0.463652 | 1.377158  | 1.209445     |
| 8    | -1.688744 | 0.215111  | -1.778847    |
| 8    | 1.888932  | 1.273854  | 0.619933     |
| 8    | -2.196399 | -1.717729 | 0.608611     |
| 8    | 0.616313  | -1.686056 | 0.892595     |
| 8    | 2.719510  | -1.112649 | -0.817181    |
| 1    | -2.441261 | -1.941831 | -0.291885    |
| 1    | -0.386078 | 1.735591  | 2.221723     |
| 1    | 2.812216  | -0.222317 | -0.451238    |
| 1    | -2.573596 | 1.032844  | 0.775880     |
| 1    | 1.357839  | -1.633920 | 0.259257     |
| 1    | 2.350681  | -0.972973 | -1.693625    |
| 1    | -1.238616 | -1.860279 | 0.656661     |
| 1    | 0.965946  | -2.121259 | 1.672550     |

Energy -608.618856 (Hartree)

Frequencies (cm-1):

|         |         |         |         |         |         |         |         |
|---------|---------|---------|---------|---------|---------|---------|---------|
| 35.49   | 58.99   | 64.39   | 104.20  | 117.78  | 142.48  | 154.75  | 174.49  |
| 186.19  | 208.36  | 224.62  | 256.20  | 279.06  | 293.23  | 295.79  | 380.52  |
| 420.17  | 468.83  | 533.31  | 574.60  | 643.29  | 652.98  | 669.75  | 714.72  |
| 784.88  | 815.69  | 872.99  | 900.83  | 966.44  | 994.70  | 1079.19 | 1098.30 |
| 1320.95 | 1339.54 | 1645.34 | 1649.20 | 1660.45 | 1690.82 | 1889.51 | 1968.82 |
| 3279.67 | 3305.02 | 3561.15 | 3722.21 | 3789.08 | 3917.21 | 3925.29 | 3929.71 |

**Formation of maleic anhydride with OH:****Triplet O<sub>2</sub>**

| Atom | X        | Y        | Z (Angstrom) |
|------|----------|----------|--------------|
| 8    | 0.000000 | 0.000000 | 0.594932     |
| 8    | 0.000000 | 0.000000 | -0.594932    |

Energy -150.321735 (Hartree)

Frequencies (cm-1):

1758.25

**OH**

| Atom | X        | Y        | Z (Angstrom) |
|------|----------|----------|--------------|
| 8    | 0.000000 | 0.000000 | 0.107936     |
| 1    | 0.000000 | 0.000000 | -0.863486    |

Energy -75.730487 (Hartree)

Frequencies (cm-1):

3776.00

**OOH**

| Atom | X         | Y         | Z (Angstrom) |
|------|-----------|-----------|--------------|
| 8    | 0.055050  | -0.600572 | 0.000000     |
| 8    | 0.055050  | 0.708417  | 0.000000     |
| 1    | -0.880808 | -0.862760 | 0.000000     |

Energy -150.904168 (Hartree)

Frequencies (cm-1):

1254.95 1459.86 3700.76

**NO**

| Atom | X        | Y        | Z (Angstrom) |
|------|----------|----------|--------------|
| 7    | 0.000000 | 0.000000 | -0.606661    |
| 8    | 0.000000 | 0.000000 | 0.530829     |

Energy -129.891119 (Hartree)

Frequencies (cm-1): 2074.35

**NO<sub>2</sub>**

| Atom | X        | Y         | Z (Angstrom) |
|------|----------|-----------|--------------|
| 7    | 0.000000 | 0.000000  | 0.315041     |
| 8    | 0.000000 | 1.090464  | -0.137830    |
| 8    | 0.000000 | -1.090464 | -0.137830    |

Energy -205.070765 (Hartree)

Frequencies (cm-1):

|        |         |         |
|--------|---------|---------|
| 784.74 | 1470.98 | 1786.94 |
|--------|---------|---------|

**A**

| Atom | X         | Y         | Z (Angstrom) |
|------|-----------|-----------|--------------|
| 6    | -0.973626 | 1.052301  | -0.000005    |
| 6    | -1.637087 | -0.097394 | -0.000005    |
| 8    | -0.939506 | -1.272029 | 0.000004     |
| 6    | 0.479191  | 1.159458  | 0.000009     |
| 6    | 1.331959  | 0.152714  | 0.000000     |
| 8    | 2.142786  | -0.668537 | -0.000007    |
| 1    | 0.956936  | 2.128539  | 0.000024     |
| 1    | -1.535291 | 1.972703  | -0.000014    |
| 1    | -2.716254 | -0.156131 | -0.000014    |
| 1    | -1.534250 | -2.023064 | 0.000026     |

Energy -305.216208 (Hartree)

Frequencies (cm-1):

|         |         |         |         |         |         |         |         |
|---------|---------|---------|---------|---------|---------|---------|---------|
| 103.19  | 150.40  | 212.64  | 269.23  | 479.16  | 536.67  | 591.83  | 618.86  |
| 741.80  | 828.88  | 921.99  | 949.66  | 1084.24 | 1150.33 | 1226.14 | 1284.51 |
| 1413.37 | 1461.13 | 1764.24 | 2238.73 | 3220.35 | 3224.48 | 3257.08 | 3926.26 |

**TS Habs**

| Atom | X         | Y         | Z (Angstrom) |
|------|-----------|-----------|--------------|
| 6    | 0.557250  | 1.568910  | -0.140568    |
| 6    | 1.662833  | 0.660434  | -0.355195    |
| 6    | 1.655180  | -0.637445 | -0.090583    |
| 8    | 1.742891  | -1.766513 | 0.113517     |
| 6    | -0.642401 | 1.189639  | 0.315519     |
| 8    | -0.849070 | -0.094688 | 0.655690     |
| 8    | -2.980889 | -0.802656 | -0.389990    |
| 1    | -2.763535 | -0.557121 | -1.302893    |
| 1    | 2.598291  | 1.013005  | -0.764925    |
| 1    | 0.729434  | 2.613488  | -0.348120    |
| 1    | -1.459505 | 1.884984  | 0.461185     |
| 1    | -1.805315 | -0.332719 | 0.545979     |

Energy -380.952265 (Hartree)

Frequencies (cm-1):

|          |         |         |         |         |         |         |         |
|----------|---------|---------|---------|---------|---------|---------|---------|
| 1314.23i | 30.81   | 66.21   | 133.99  | 155.69  | 193.97  | 254.21  | 293.42  |
| 479.45   | 486.79  | 536.80  | 596.27  | 624.70  | 776.07  | 842.91  | 936.07  |
| 961.85   | 1099.06 | 1155.42 | 1231.46 | 1262.40 | 1409.60 | 1463.20 | 1627.73 |
| 2179.90  | 2693.58 | 3200.45 | 3225.85 | 3250.37 | 3790.90 |         |         |

**rad**

| Atom | X         | Y         | Z (Angstrom) |
|------|-----------|-----------|--------------|
| 6    | -1.403051 | 0.650773  | 0.000003     |
| 6    | -1.265611 | -0.727757 | -0.000001    |
| 8    | 0.013077  | -1.105380 | 0.000000     |
| 6    | -0.126744 | 1.173749  | -0.000001    |
| 6    | 0.804700  | 0.069171  | 0.000000     |
| 8    | 1.999578  | -0.003141 | -0.000001    |
| 1    | 0.186755  | 2.202361  | 0.000004     |
| 1    | -2.339416 | 1.181160  | -0.000010    |
| 1    | -2.004342 | -1.510970 | 0.000001     |

Energy -304.625857 (Hartree)

Frequencies (cm-1):

|        |        |         |         |         |         |         |         |
|--------|--------|---------|---------|---------|---------|---------|---------|
| 259.76 | 500.25 | 534.97  | 689.70  | 710.48  | 764.34  | 803.63  | 819.06  |
| 884.23 | 924.02 | 1046.87 | 1101.69 | 1123.54 | 1225.99 | 1367.51 | 1423.56 |

1521.12 1816.71 3273.46 3287.61 3300.91

### TS rad+O<sub>2</sub>

| Atom | X         | Y         | Z (Angstrom) |
|------|-----------|-----------|--------------|
| 6    | 0.328076  | 1.483335  | -0.377870    |
| 6    | 0.617116  | 0.797598  | 0.836693     |
| 8    | -0.339820 | -0.078000 | 1.129159     |
| 6    | -0.739138 | 0.866130  | -0.924192    |
| 6    | -1.219145 | -0.146721 | 0.020768     |
| 8    | -2.143910 | -0.890219 | 0.014849     |
| 1    | -1.220789 | 1.044216  | -1.869553    |
| 1    | 0.936725  | 2.267769  | -0.794010    |
| 1    | 1.276822  | 1.084612  | 1.637652     |
| 8    | 1.910802  | -0.553626 | -0.001533    |
| 8    | 1.208651  | -1.277986 | -0.680785    |

Energy -454.943896 (Hartree)

Frequencies (cm<sup>-1</sup>):

|         |         |         |         |         |         |         |         |
|---------|---------|---------|---------|---------|---------|---------|---------|
| 494.09i | 114.51  | 141.45  | 215.24  | 302.32  | 404.78  | 500.63  | 569.93  |
| 703.52  | 716.51  | 808.69  | 818.69  | 864.87  | 874.86  | 966.27  | 1050.92 |
| 1098.07 | 1118.70 | 1228.59 | 1367.87 | 1407.33 | 1514.71 | 1591.40 | 1903.12 |
| 3270.95 | 3282.41 | 3298.21 |         |         |         |         |         |

### peroxyl rad

| Atom | X         | Y         | Z (Angstrom) |
|------|-----------|-----------|--------------|
| 6    | -0.112795 | 1.488161  | 0.125162     |
| 6    | 0.677306  | 0.254961  | 0.459114     |
| 8    | -0.216010 | -0.812590 | 0.352510     |
| 6    | -1.352395 | 1.129427  | -0.156277    |
| 6    | -1.455168 | -0.350001 | -0.026959    |
| 8    | -2.385786 | -1.065762 | -0.187919    |
| 1    | -2.192933 | 1.737120  | -0.445817    |
| 1    | 0.327921  | 2.472242  | 0.116716     |
| 1    | 1.153990  | 0.243819  | 1.437703     |
| 8    | 1.716639  | 0.110592  | -0.518410    |
| 8    | 2.656324  | -0.680798 | -0.085535    |

Energy -454.971637 (Hartree)

Frequencies (cm<sup>-1</sup>):

|         |         |         |         |         |         |         |         |
|---------|---------|---------|---------|---------|---------|---------|---------|
| 71.48   | 124.05  | 214.15  | 351.65  | 460.01  | 500.73  | 565.91  | 702.93  |
| 717.64  | 825.28  | 856.52  | 903.46  | 999.24  | 1017.98 | 1043.63 | 1089.97 |
| 1146.89 | 1179.57 | 1258.75 | 1340.68 | 1378.92 | 1384.50 | 1707.27 | 1939.09 |
| 3134.34 | 3258.41 | 3287.89 |         |         |         |         |         |

### oxyl radical

| Atom | X         | Y         | Z (Angstrom) |
|------|-----------|-----------|--------------|
| 6    | 0.705035  | 1.221260  | 0.126383     |
| 6    | 1.115681  | -0.227292 | 0.356220     |
| 8    | -0.090191 | -0.967481 | 0.244031     |
| 6    | -0.595142 | 1.255147  | -0.095798    |
| 6    | -1.134820 | -0.131864 | -0.021423    |
| 8    | -2.255283 | -0.505896 | -0.149527    |
| 1    | -1.226500 | 2.103830  | -0.300359    |
| 1    | 1.427965  | 2.020555  | 0.136640     |
| 1    | 1.516564  | -0.378143 | 1.371012     |
| 8    | 2.062655  | -0.582842 | -0.519452    |

Energy -379.813215 (Hartree)

Frequencies (cm<sup>-1</sup>):

|         |         |         |         |         |         |         |         |
|---------|---------|---------|---------|---------|---------|---------|---------|
| 127.07  | 230.81  | 388.44  | 489.11  | 554.86  | 696.55  | 707.15  | 779.88  |
| 849.54  | 897.32  | 920.73  | 1002.25 | 1061.59 | 1096.26 | 1122.70 | 1168.71 |
| 1197.89 | 1321.01 | 1350.98 | 1699.20 | 1925.01 | 2983.75 | 3260.91 | 3283.52 |

**TS Habs by O<sub>2</sub>**

| Atom | X         | Y         | Z (Angstrom) |
|------|-----------|-----------|--------------|
| 6    | 1.831225  | -0.409043 | -0.028475    |
| 8    | 0.629426  | -0.714006 | 0.546636     |
| 6    | -0.263289 | 0.375444  | 0.378213     |
| 6    | 0.532984  | 1.451215  | -0.319386    |
| 6    | 1.747727  | 0.981790  | -0.551370    |
| 8    | -1.141117 | 0.584375  | 1.246546     |
| 8    | 2.743878  | -1.169990 | -0.070276    |
| 1    | 2.588275  | 1.466800  | -1.019514    |
| 1    | 0.103347  | 2.414072  | -0.544325    |
| 1    | -1.019946 | -0.008964 | -0.553420    |
| 8    | -2.306592 | -0.537331 | -1.012227    |
| 8    | -3.021040 | -0.446591 | -0.055259    |

Energy -530.121399 (Hartree)

Frequencies (cm<sup>-1</sup>):

|          |         |         |         |         |         |         |         |
|----------|---------|---------|---------|---------|---------|---------|---------|
| 1335.42i | 60.70   | 96.13   | 139.83  | 184.88  | 232.18  | 321.54  | 402.33  |
| 522.96   | 541.13  | 600.71  | 684.23  | 724.41  | 799.24  | 854.71  | 884.31  |
| 921.30   | 1002.30 | 1049.45 | 1064.98 | 1088.12 | 1231.15 | 1254.23 | 1332.22 |
| 1615.48  | 1686.12 | 1687.83 | 1920.07 | 3259.53 | 3282.07 |         |         |

**Anhydride**

| Atom | X         | Y         | Z (Angstrom) |
|------|-----------|-----------|--------------|
| 6    | 0.661714  | 1.255844  | 0.000000     |
| 6    | 1.121775  | -0.162477 | -0.000000    |
| 8    | -0.000000 | -0.964313 | 0.000000     |
| 6    | -0.661714 | 1.255844  | -0.000000    |
| 6    | -1.121775 | -0.162476 | -0.000000    |
| 8    | -2.222913 | -0.597813 | 0.000000     |
| 1    | -1.356309 | 2.079547  | 0.000000     |
| 1    | 1.356310  | 2.079547  | 0.000000     |
| 8    | 2.222913  | -0.597813 | 0.000000     |

Energy -379.295342 (Hartree)

Frequencies (cm<sup>-1</sup>):

|         |         |         |         |         |         |         |         |
|---------|---------|---------|---------|---------|---------|---------|---------|
| 166.40  | 271.13  | 413.70  | 566.74  | 650.47  | 653.68  | 715.46  | 797.77  |
| 883.09  | 893.25  | 961.60  | 1014.93 | 1076.54 | 1089.83 | 1311.70 | 1336.73 |
| 1693.55 | 1910.43 | 1978.87 | 3265.64 | 3286.84 |         |         |         |

**S1 - First excited state****2-butenedial**

| Atom | X         | Y        | Z (Angstrom) |
|------|-----------|----------|--------------|
| C    | -1.101424 | 0.000000 | -0.863990    |
| C    | -0.063582 | 0.000000 | -1.869102    |
| O    | 1.134633  | 0.000000 | -1.633114    |
| C    | -0.910054 | 0.000000 | 0.547255     |
| C    | 0.288818  | 0.000000 | 1.185044     |
| O    | 0.398237  | 0.000000 | 2.528802     |
| H    | -1.796521 | 0.000000 | 1.156906     |
| H    | 1.262501  | 0.000000 | 0.679930     |
| H    | -2.113111 | 0.000000 | -1.225175    |
| H    | -0.399141 | 0.000000 | -2.903409    |

Energy -303.48573585 (Hartree)

Frequencies (cm<sup>-1</sup>):

|         |         |         |         |         |         |         |         |
|---------|---------|---------|---------|---------|---------|---------|---------|
| 178.99  | 188.44  | 222.79  | 337.36  | 408.74  | 513.74  | 677.56  | 742.47  |
| 874.77  | 970.42  | 985.75  | 1002.91 | 1140.09 | 1225.72 | 1299.45 | 1406.42 |
| 1562.70 | 1651.74 | 1750.53 | 3129.72 | 3231.92 | 3353.87 | 3380.59 |         |

**TS ring closure**

| Atom | X         | Y         | Z (Angstrom) |
|------|-----------|-----------|--------------|
| C    | -0.431143 | 0.182898  | -0.927672    |
| C    | -0.139350 | 1.267949  | 0.048409     |
| O    | 0.419340  | -0.136722 | -1.823221    |
| O    | -0.158124 | -1.262794 | 0.257420     |
| C    | 0.178821  | 0.790334  | 1.316513     |
| C    | 0.131307  | -0.583614 | 1.394459     |
| H    | 0.202194  | -1.209476 | 2.260504     |
| H    | 0.411327  | 1.407992  | 2.161605     |
| H    | -0.161801 | 2.299171  | -0.242309    |
| H    | -1.495469 | -0.034863 | -1.152629    |

Energy -303.4393962 (Hartree)

Frequencies (cm-1):

848.56i 163.24 315.71 438.30 515.82 563.77 650.23 690.66 879.60  
899.89 903.40 1022.71 1096.03 1153.92 1255.44 1351.73 1405.87 1460.95  
1528.50 1614.01 2977.08 3402.70 3415.38 3434.27

**Cyclic intermediate - conical intersection**

| Atom | X         | Y         | Z (Angstrom) |
|------|-----------|-----------|--------------|
| C    | 0.077691  | -0.328755 | 0.809312     |
| C    | 1.222892  | -0.091199 | -0.130555    |
| O    | -0.013548 | 0.306936  | 1.924862     |
| O    | -1.160742 | -0.106883 | -0.163730    |
| C    | 0.743906  | 0.115105  | -1.396605    |
| C    | -0.660826 | 0.126266  | -1.355400    |
| H    | -1.356979 | 0.274385  | -2.154275    |
| H    | 1.324797  | 0.271127  | -2.283106    |
| H    | 2.242601  | -0.163577 | 0.186293     |
| H    | -0.058736 | -1.429384 | 1.001604     |

Energy -303.45989428 (Hartree)

**TS H-transfer**

| Atom | X         | Y        | Z (Angstrom) |
|------|-----------|----------|--------------|
| C    | -1.102687 | 0.000000 | -0.977294    |
| C    | 0.079520  | 0.000000 | -1.707912    |
| O    | 1.264818  | 0.000000 | -1.185807    |
| C    | -1.114660 | 0.000000 | 0.419966     |
| C    | 0.130398  | 0.000000 | 1.097464     |
| O    | 0.429289  | 0.000000 | 2.261676     |
| H    | -2.026338 | 0.000000 | 0.986640     |
| H    | -2.025941 | 0.000000 | -1.523586    |
| H    | 0.072752  | 0.000000 | -2.784030    |
| H    | 1.009655  | 0.000000 | 0.158990     |

Energy -303.4755490 (Hartree)

Frequencies (cm-1):

1292.30i 222.43 388.34 421.79 521.96 553.54 558.71 835.47  
873.42 881.52 948.00 1048.81 1173.78 1188.93 1235.19 1373.81 1503.89  
1567.31 1604.79 1724.95 1852.36 3361.51 3391.66 3407.55

**Ketene-enol - conical intersection**

| Atom | X         | Y        | Z (Angstrom) |
|------|-----------|----------|--------------|
| C    | -1.115614 | 0.000000 | -0.859220    |
| C    | -0.109487 | 0.000000 | -1.792514    |
| O    | 1.209426  | 0.000000 | -1.569061    |
| C    | -1.014595 | 0.000000 | 0.549742     |
| C    | 0.210815  | 0.000000 | 1.264909     |
| O    | 0.500482  | 0.000000 | 2.423036     |
| H    | -1.914927 | 0.000000 | 1.138103     |
| H    | -2.110404 | 0.000000 | -1.265301    |

|        |              |          |           |
|--------|--------------|----------|-----------|
| H      | -0.332155    | 0.000000 | -2.840164 |
| H      | 1.392429     | 0.000000 | -0.613104 |
| Energy | -303.5073118 |          | (Hartree) |

#### Ketene-enol - ground state

| Atom   | X             | Y         | Z (Angstrom) |
|--------|---------------|-----------|--------------|
| C      | -1.081513     | -0.219250 | -0.800812    |
| C      | -0.079280     | -0.283169 | -1.695876    |
| O      | 1.161787      | 0.235210  | -1.571197    |
| C      | -1.002475     | 0.420317  | 0.530998     |
| C      | -0.093464     | 0.062805  | 1.424258     |
| O      | 0.705014      | -0.251878 | 2.206972     |
| H      | -1.721324     | 1.150251  | 0.850996     |
| H      | -2.018979     | -0.666311 | -1.074956    |
| H      | -0.195748     | -0.791260 | -2.632416    |
| H      | 1.195724      | 0.801849  | -0.783594    |
| Energy | -303.55904586 |           | (Hartree)    |

### S2 - Second excited state

#### 2-butenedial

| Atom   | X             | Y        | Z (Angstrom) |
|--------|---------------|----------|--------------|
| C      | -1.078306     | 0.000000 | -0.851517    |
| C      | -0.145095     | 0.000000 | -1.877670    |
| O      | 1.136337      | 0.000000 | -1.722350    |
| C      | -0.868093     | 0.000000 | 0.566390     |
| C      | 0.338972      | 0.000000 | 1.254911     |
| O      | 0.369405      | 0.000000 | 2.539508     |
| H      | -1.752512     | 0.000000 | 1.177665     |
| H      | 1.315675      | 0.000000 | 0.747957     |
| H      | -2.102899     | 0.000000 | -1.175004    |
| H      | -0.477722     | 0.000000 | -2.902935    |
| Energy | -303.47017495 |          | (Hartree)    |

Frequencies (cm-1):

|         |         |         |         |         |         |         |         |
|---------|---------|---------|---------|---------|---------|---------|---------|
| 122.12  | 182.16  | 208.51  | 337.11  | 469.44  | 525.29  | 746.68  | 823.95  |
| 859.09  | 870.81  | 918.70  | 1029.31 | 1204.76 | 1255.50 | 1339.16 | 1377.31 |
| 1515.14 | 1597.71 | 3083.19 | 3323.25 | 3360.61 | 3378.20 | 4353.57 |         |

#### 2-butenedial - conical intersection

| Atom   | X             | Y        | Z (Angstrom) |
|--------|---------------|----------|--------------|
| C      | -0.992252     | 0.000000 | -0.738913    |
| C      | -0.270230     | 0.000000 | -1.926573    |
| O      | 0.972483      | 0.000000 | -2.206733    |
| C      | -0.647916     | 0.000000 | 0.664467     |
| C      | 0.507477      | 0.000000 | 1.442007     |
| O      | 0.264192      | 0.000000 | 2.708012     |
| H      | -1.525846     | 0.000000 | 1.295455     |
| H      | 1.555589      | 0.000000 | 1.139570     |
| H      | -2.054079     | 0.000000 | -0.915924    |
| H      | -0.888131     | 0.000000 | -2.814688    |
| Energy | -303.47502427 |          | (Hartree)    |

#### TS H-transfer

| Atom | X         | Y        | Z (Angstrom) |
|------|-----------|----------|--------------|
| C    | -1.073623 | 0.000000 | -1.048246    |
| C    | 0.074165  | 0.000000 | -1.741526    |
| O    | 1.297981  | 0.000000 | -1.155462    |
| C    | -1.101879 | 0.000000 | 0.413539     |



|   |           |          |           |
|---|-----------|----------|-----------|
| C | 0.053049  | 0.000000 | 1.089125  |
| O | 0.420065  | 0.000000 | 2.314591  |
| H | -2.039748 | 0.000000 | 0.934354  |
| H | -1.997687 | 0.000000 | -1.592140 |
| H | 0.158700  | 0.000000 | -2.811469 |
| H | 1.015745  | 0.000000 | 0.407644  |

Energy -303.43373387 (Hartree)

Frequencies (cm-1):

|          |         |         |         |         |         |         |         |         |
|----------|---------|---------|---------|---------|---------|---------|---------|---------|
| 2080.73i | 92.86   | 279.87  | 280.36  | 464.96  | 518.14  | 581.56  | 587.42  | 647.38  |
| 862.01   | 899.11  | 1042.48 | 1121.18 | 1142.46 | 1246.68 | 1378.09 | 1482.21 | 1504.71 |
| 1629.05  | 1716.62 | 1829.96 | 3363.95 | 3389.94 | 3407.36 |         |         |         |

# **TS ring closure**

| Atom | X         | Y         | Z (Angstrom) |
|------|-----------|-----------|--------------|
| C    | -0.406989 | 0.144630  | -0.839484    |
| C    | -0.149331 | 1.239922  | 0.133432     |
| O    | 0.394266  | -0.041214 | -1.861540    |
| O    | -0.147973 | -1.191641 | 0.152777     |
| C    | 0.188026  | 0.727916  | 1.374679     |
| C    | 0.130044  | -0.656444 | 1.340762     |
| H    | 0.217466  | -1.350808 | 2.151046     |
| H    | 0.401356  | 1.297425  | 2.257288     |
| H    | -0.209577 | 2.274275  | -0.138003    |
| H    | -1.479663 | -0.001876 | -1.091167    |

Energy -303.44696585 (Hartree)

Frequencies (cm-1):

|         |         |         |         |         |         |         |         |
|---------|---------|---------|---------|---------|---------|---------|---------|
| 114.64i | 78.79   | 387.62  | 481.76  | 531.83  | 594.26  | 750.17  | 889.64  |
| 897.34  | 997.62  | 1058.23 | 1135.40 | 1175.01 | 1299.25 | 1362.71 | 1449.41 |
| 1544.35 | 1641.81 | 2031.32 | 2950.94 | 3410.75 | 3422.60 | 3441.01 |         |
